# Supplementary material for: Para-substituted benzoic acid ruthenium(ii) complexes: structural features modulating cytotoxicity
Source: Royal Society of Chemistry journal article supplement (doi:10.1039/d5ra07271a), 2026-04-16
Supplement: d5ra07271a1.pdf [file d5ra07271a1.pdf]

## ELETRONIC SUPPORTING INFORMATION (ESI)

### *Para*-substituted benzoic acid ruthenium(II) complexes: structural features modulating cytotoxicity

Jocely L. Dutra<sup>a</sup>, Pedro H. S. Marcon<sup>b</sup>, Gustavo Moselli<sup>a</sup>, Fabiano M. Niquini<sup>a</sup>, João Victor F. da Costa<sup>a</sup>, Carlos André F. Moraes<sup>a</sup>, Ataulpa A. C. Braga<sup>a</sup>, Javier Ellena<sup>c</sup>, Alzir A. Batista<sup>a</sup> and João Honorato de Araujo-Neto<sup>b\*</sup>

<sup>a</sup>Departament of Chemistry, Universidade Federal de São Carlos (UFSCar), 13561-905, São Carlos, SP, Brazil.

<sup>b</sup>Department of Fundamental Chemistry, Institute of Chemistry, University of São Paulo. 05508-000 São Paulo, SP, Brazil.

<sup>c</sup>Instituto de Física de São Carlos, Universidade de São Paulo (USP), CP 369, CEP 13560-970, São Carlos, SP, Brazil.

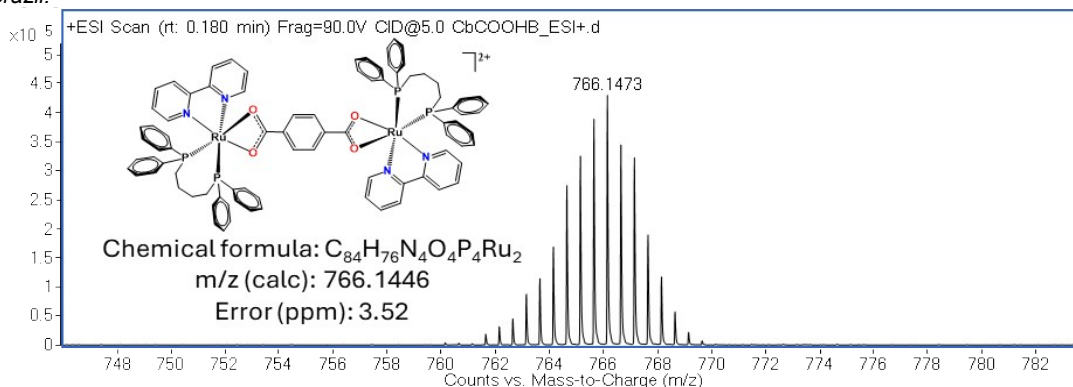

Figure S1. ESI(+)-MS analysis of the complex **RuBi**.

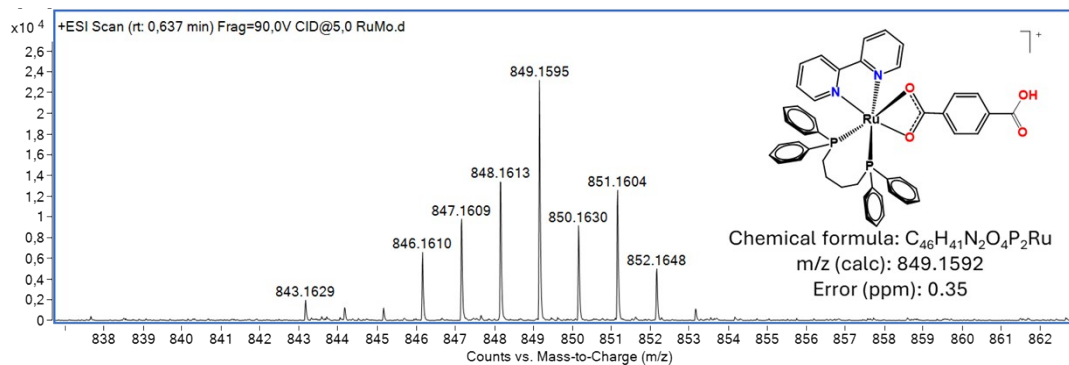

Figure S2. ESI(+)-MS analysis of the complex **RuMono**.

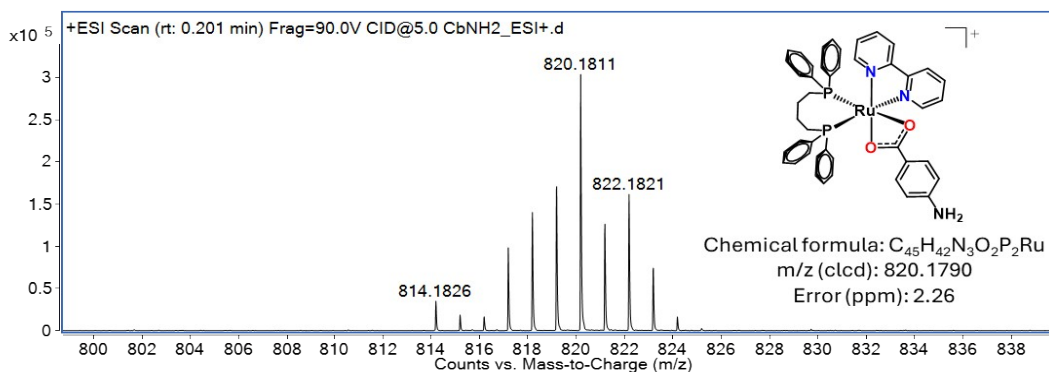

Figure S3. ESI(+)-MS analysis of the complex **RuNH<sub>2</sub>**.

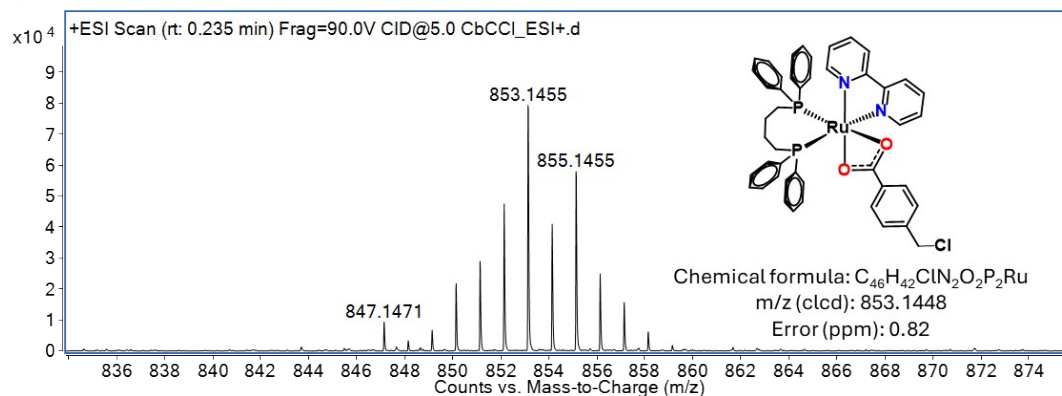

Figure S4. ESI(+)-MS analysis of the complex **RuCCI**.

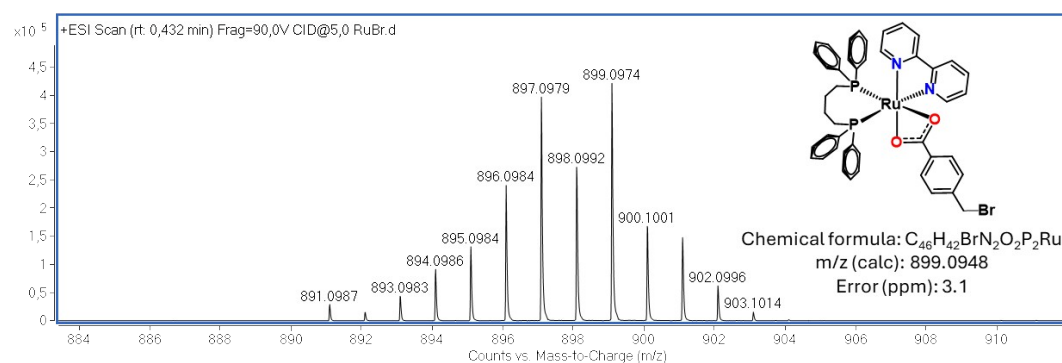

Figure S5. ESI(+)-MS analysis of the complex **RuCBr**.

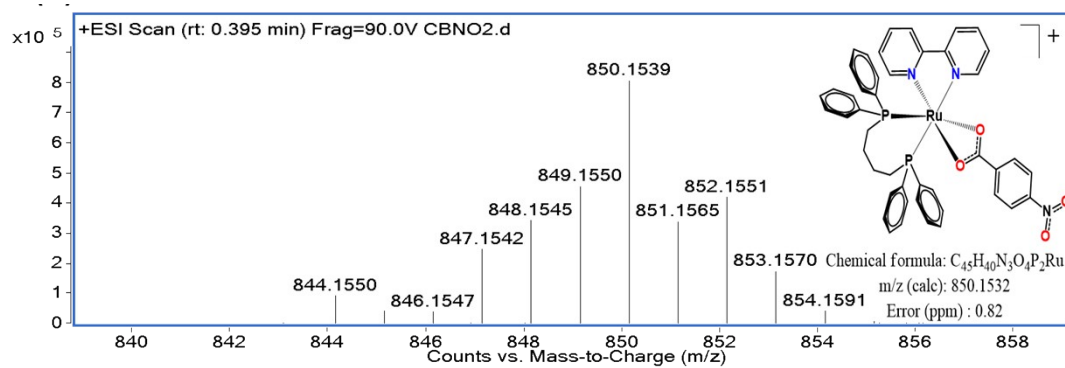

Figure S6. ESI(+)-MS analysis of the complex **RuNO<sub>2</sub>**.

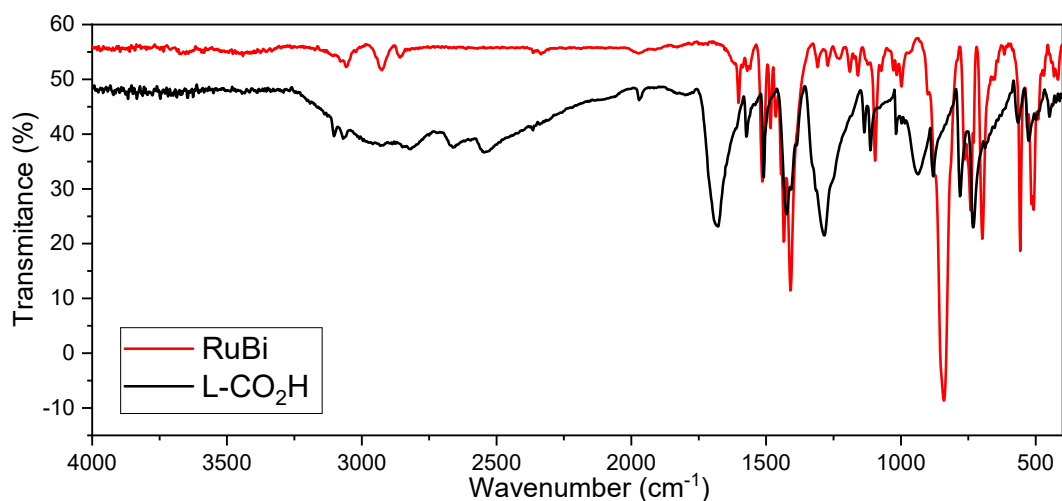

Figure S7. FTIR spectra for **RuBi** and L-CO<sub>2</sub>H.

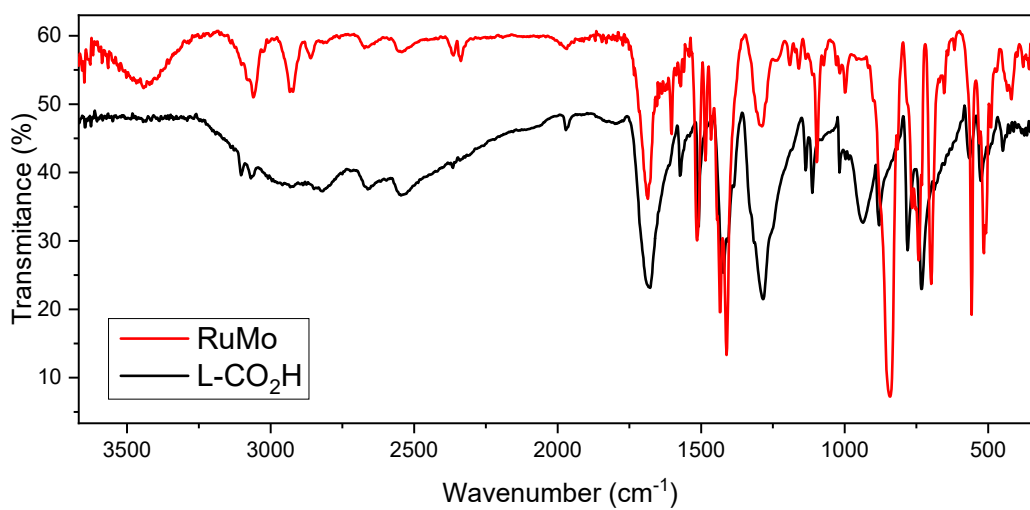

Figure S8. FTIR spectra for **RuMo** and L-CO<sub>2</sub>H.

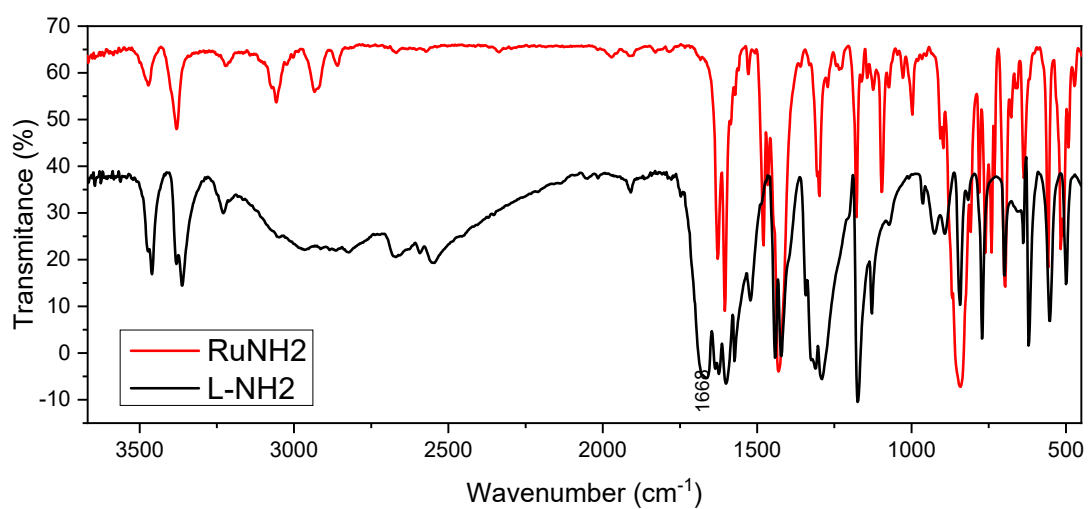

Figure S9. FTIR spectra for **RuNH<sub>2</sub>** and L-NH<sub>2</sub>.

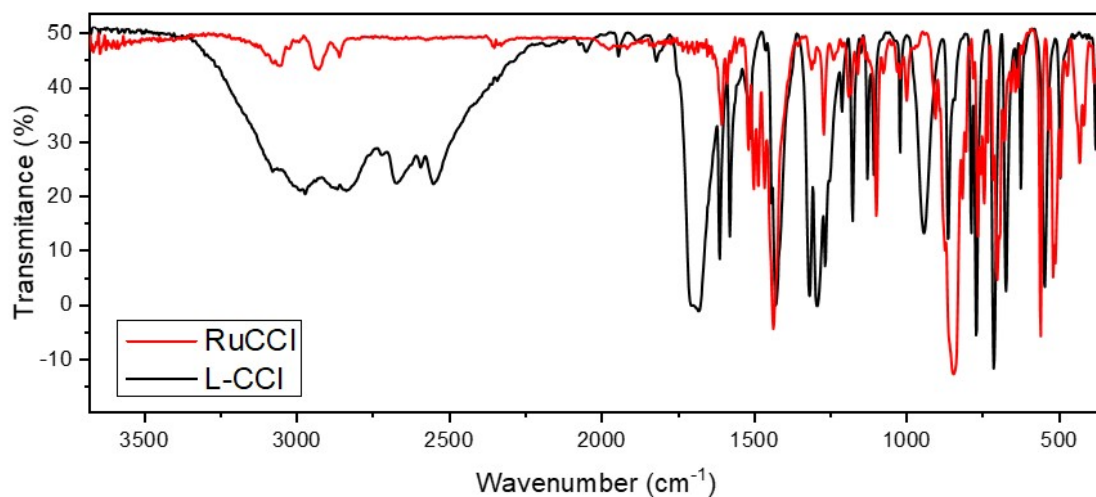

Figure S10. FTIR spectra for **RuCCI** and L-CCl.

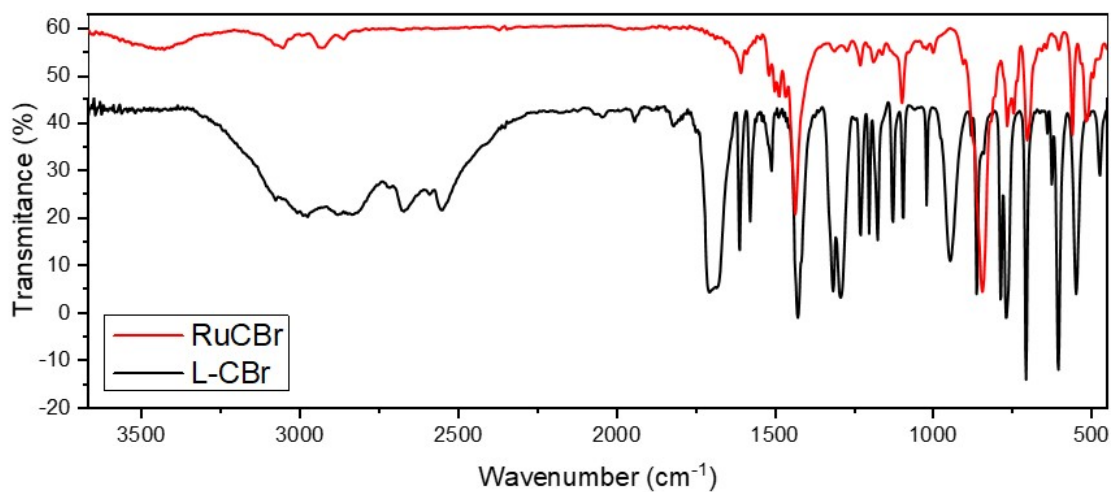

Figure S11. FTIR spectra for **RuCBr** and L-CBr.

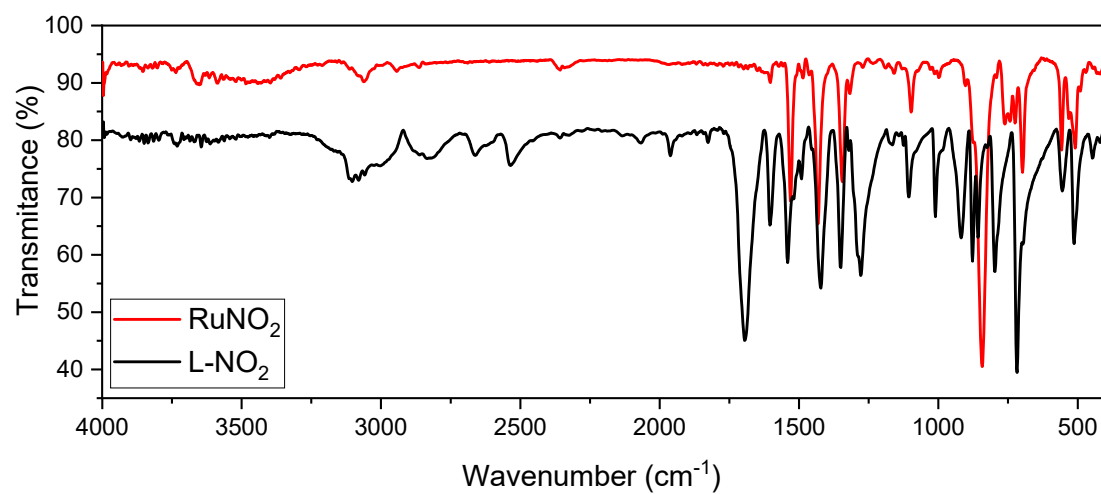

Figure S12. FTIR spectra for **RuNO<sub>2</sub>** and L-NO<sub>2</sub>.

Table S1. Wavenumber values ( $\text{cm}^{-1}$ ) for the asymmetric and symmetric stretching vibrations of the carboxylic group, as well as  $\Delta\nu$  for the respective free ligands and their complexes.

|                          | $\nu_{\text{asym}}(\text{COO})$ | $\nu_{\text{sym}}(\text{COO})$ | $\Delta\nu$ |
|--------------------------|---------------------------------|--------------------------------|-------------|
| <b>L-CO<sub>2</sub>H</b> | 1572                            | 1330                           | 242         |
| <b>L-NH<sub>2</sub></b>  | 1571                            | 1341                           | 230         |
| <b>L-CCl</b>             | 1577                            | 1316                           | 261         |
| <b>L-CBr</b>             | 1572                            | 1315                           | 257         |
| <b>L-NO<sub>2</sub></b>  | 1608                            | 1313                           | 295         |
| <b>RuBi</b>              | 1483                            | 1407                           | 76          |
| <b>RuMo</b>              | 1483                            | 1407                           | 76          |
| <b>RuNH<sub>2</sub></b>  | 1479                            | 1428                           | 51          |
| <b>RuCl</b>              | 1485                            | 1436                           | 49          |
| <b>RuBr</b>              | 1483                            | 1429                           | 54          |
| <b>RuNO<sub>2</sub></b>  | 1531                            | 1433                           | 98          |

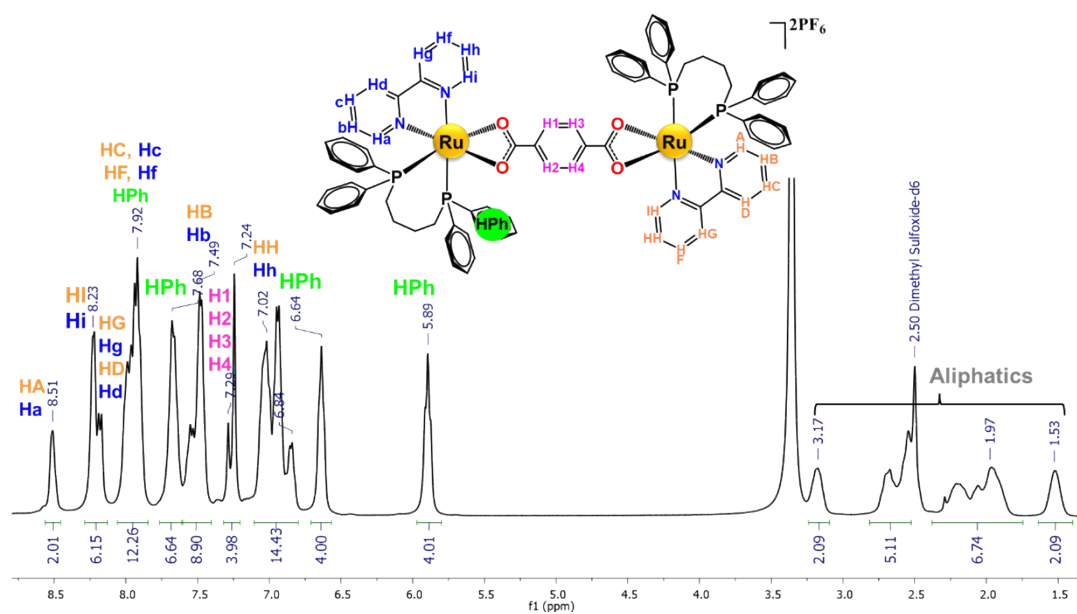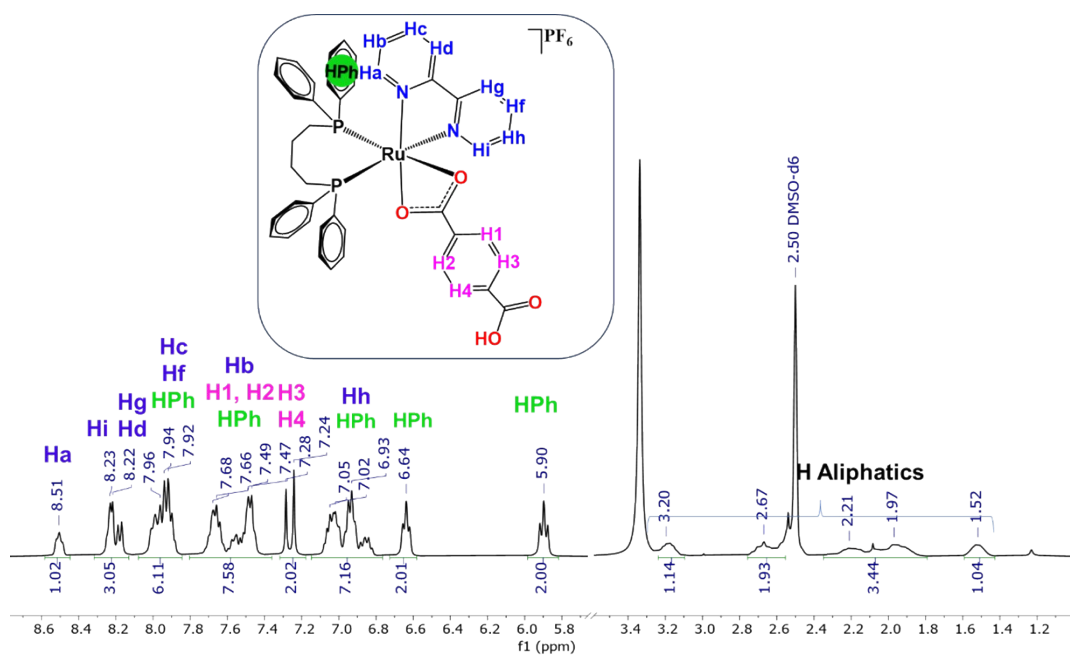

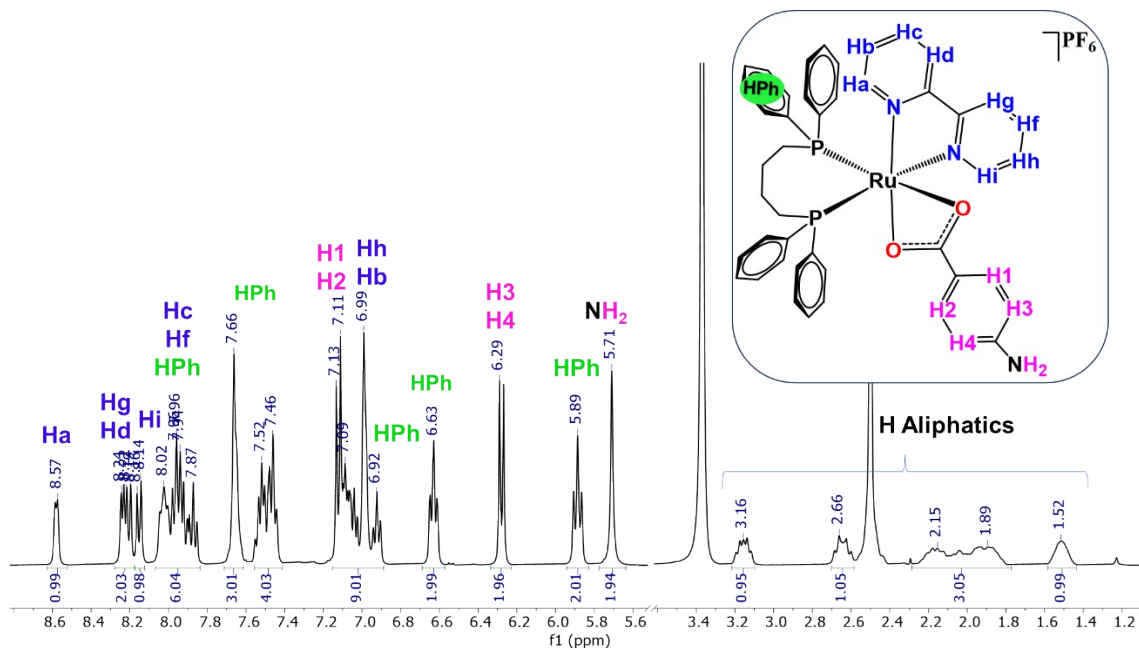

Figure S15. NMR  $^1\text{H}$  spectra and structure of the complex  $\text{RuNH}_2$ , in  $\text{DMSO-d}_6$ .

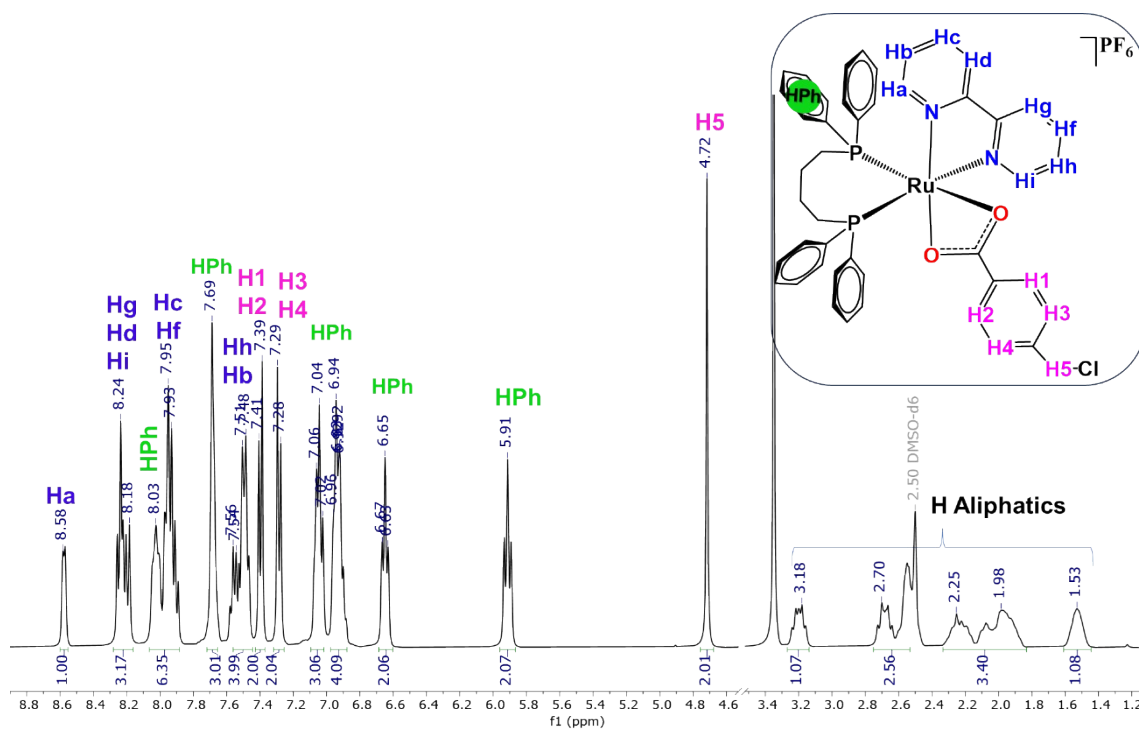

Figure S16. NMR  $^1\text{H}$  spectra of the complex  $\text{RuCCI}$ , in  $\text{DMSO-d}_6$ .

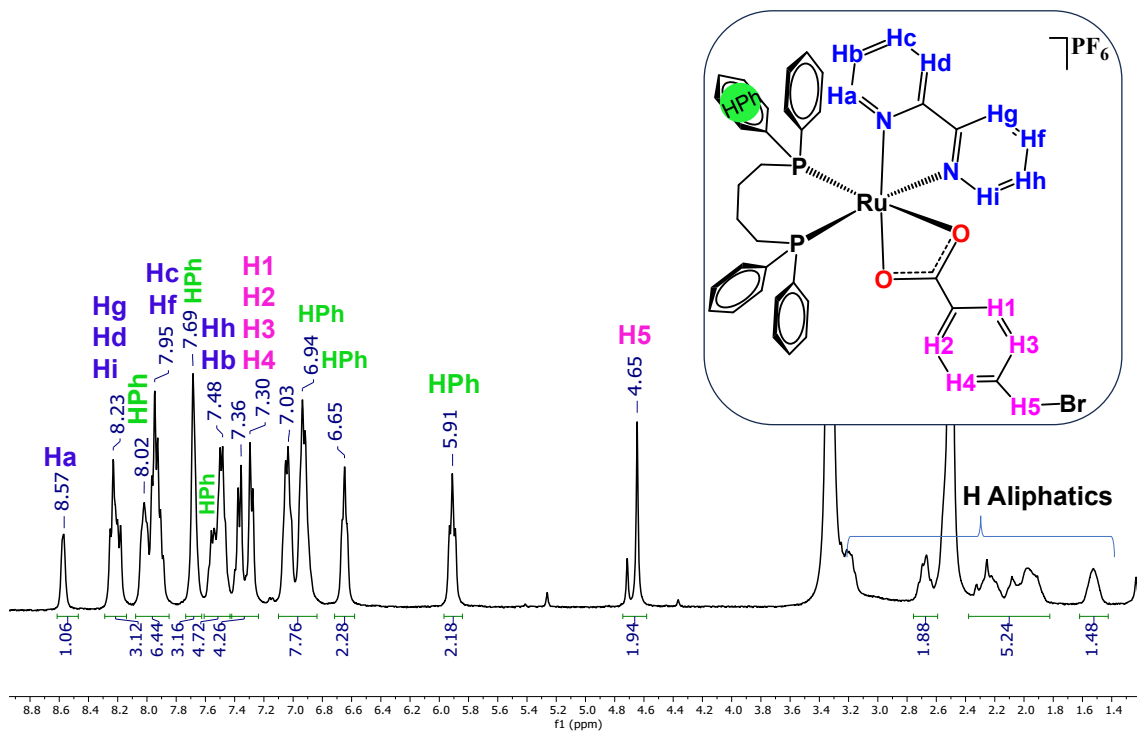

Figure S17. NMR  $^1\text{H}$  spectra of the complex **RuCBr**, in  $\text{DMSO-d}_6$ .

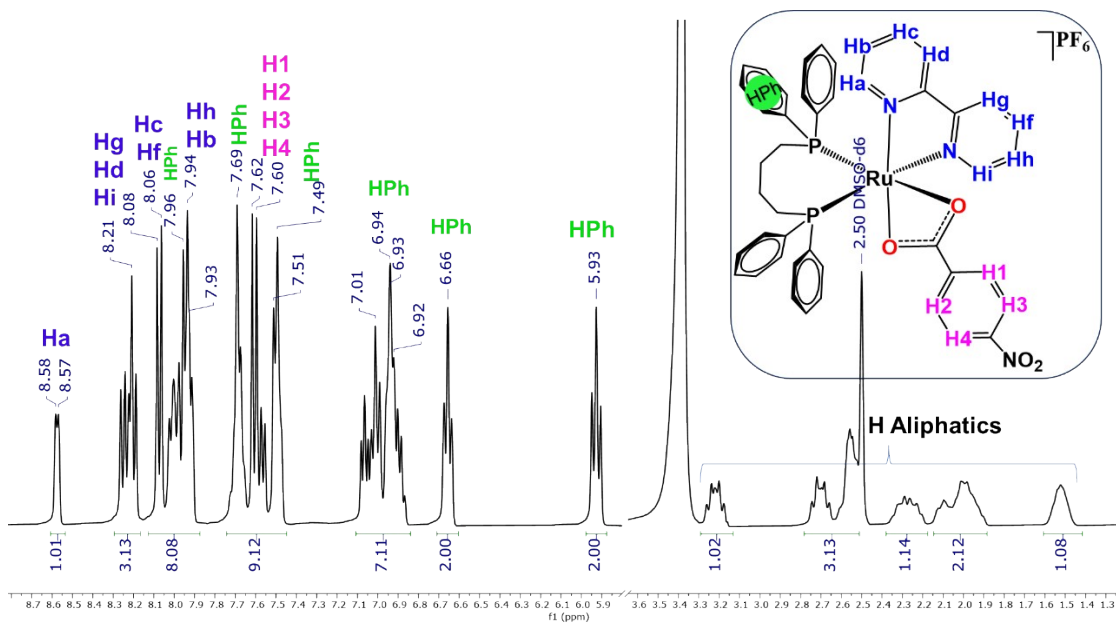

Figure S18. NMR  $^1\text{H}$  spectra of the complex **RuNO<sub>2</sub>**, in  $\text{DMSO-d}_6$ .

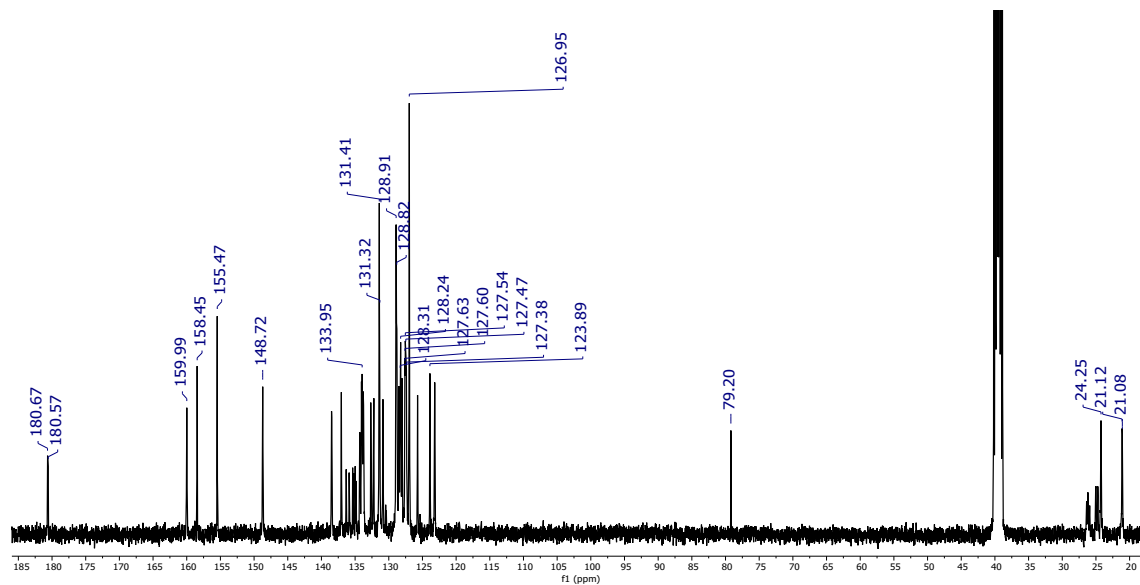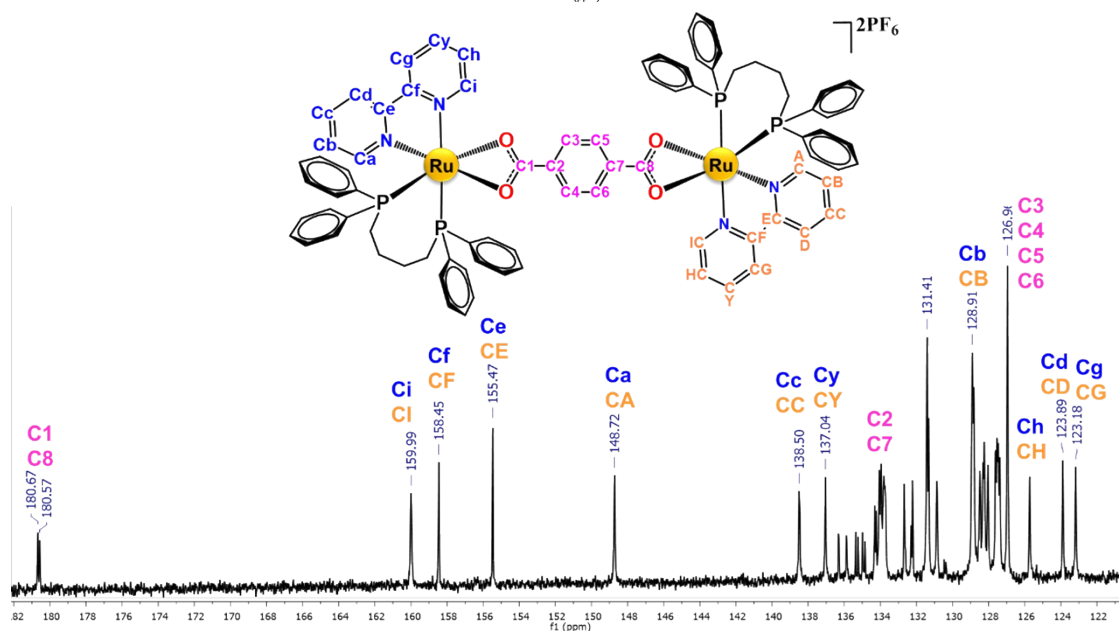

Figure S19. NMR  $^{13}\text{C}$  spectra and structure of complex **RuBi**, in  $\text{DMSO-d}_6$ .

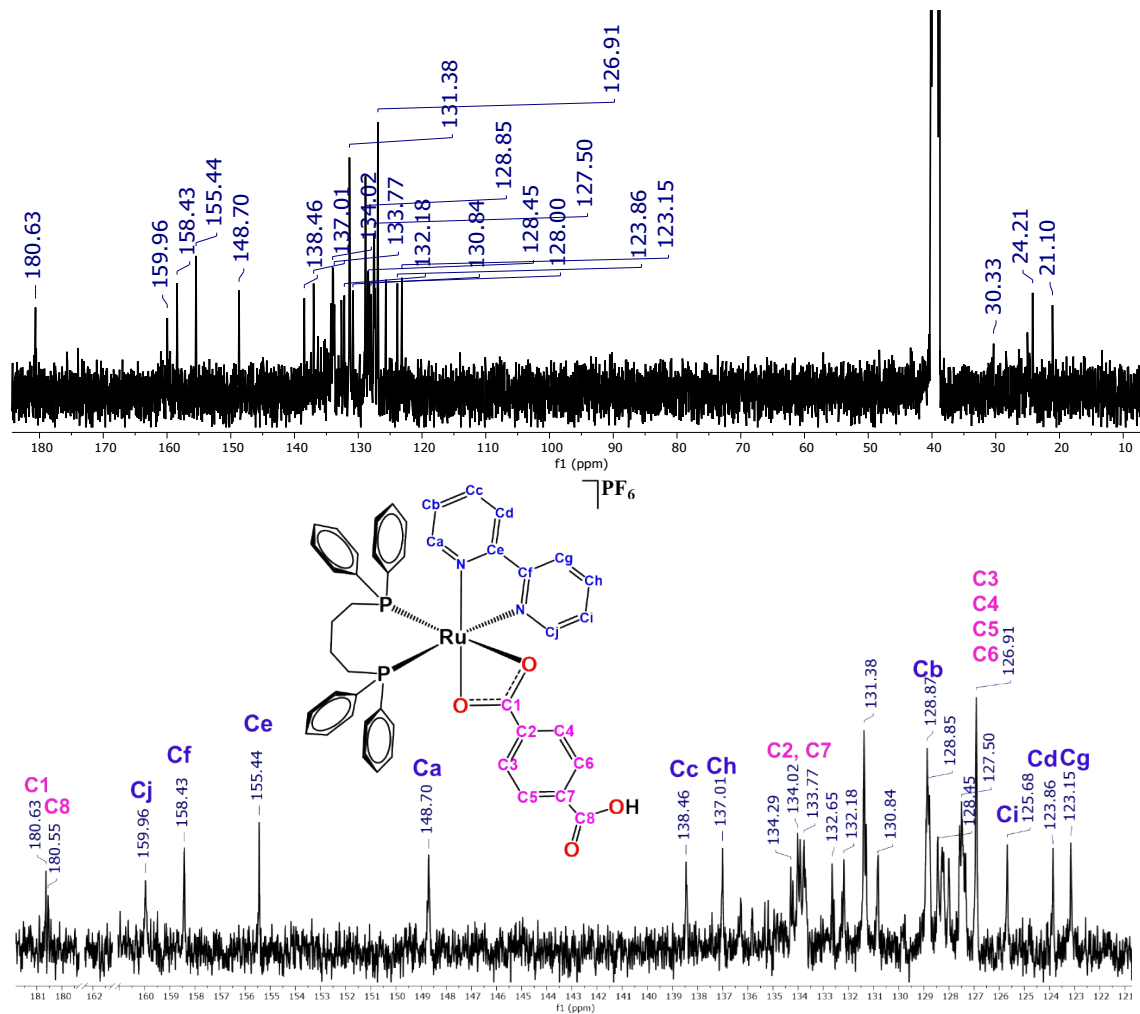

Figure S20. NMR  $^{13}\text{C}$  spectra and structure of complex **RuMo**, in  $\text{DMSO-d}_6$ .

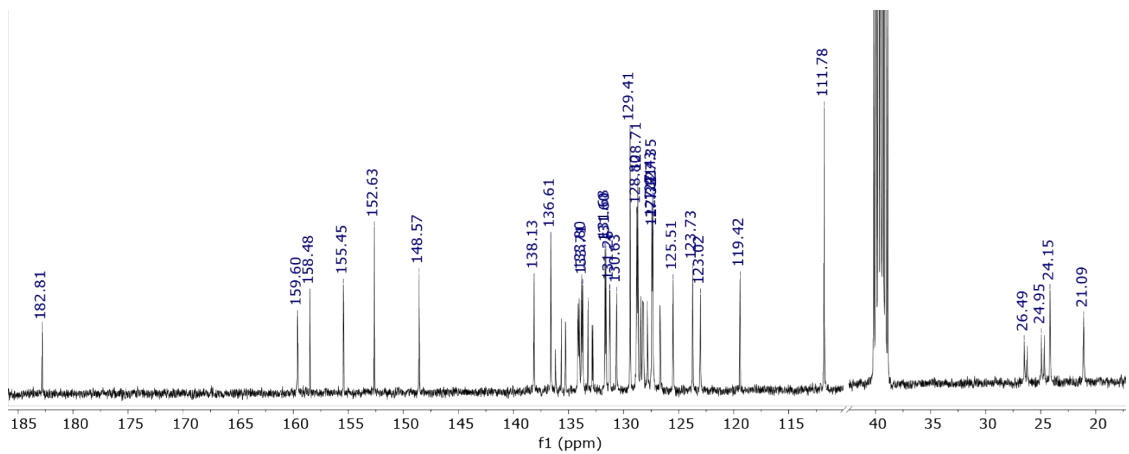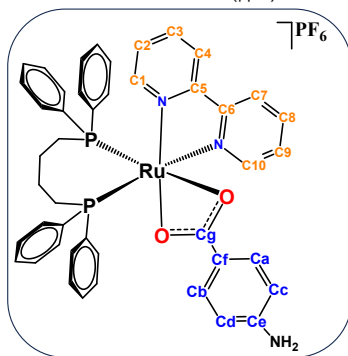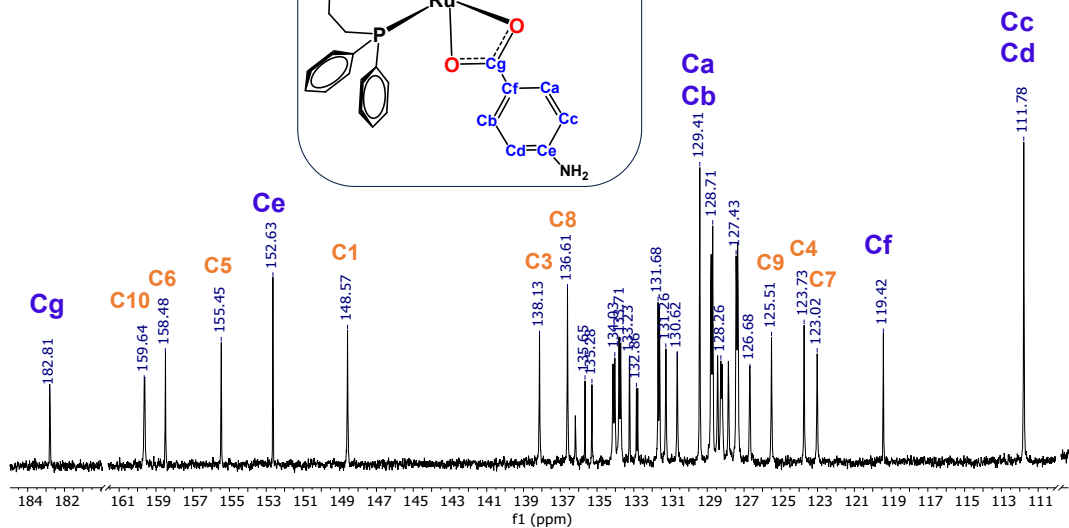

Figure S21. NMR  $^{13}\text{C}$  spectra and structure of complex  $\text{RuNH}_2$ , in  $\text{DMSO-d}_6$ .

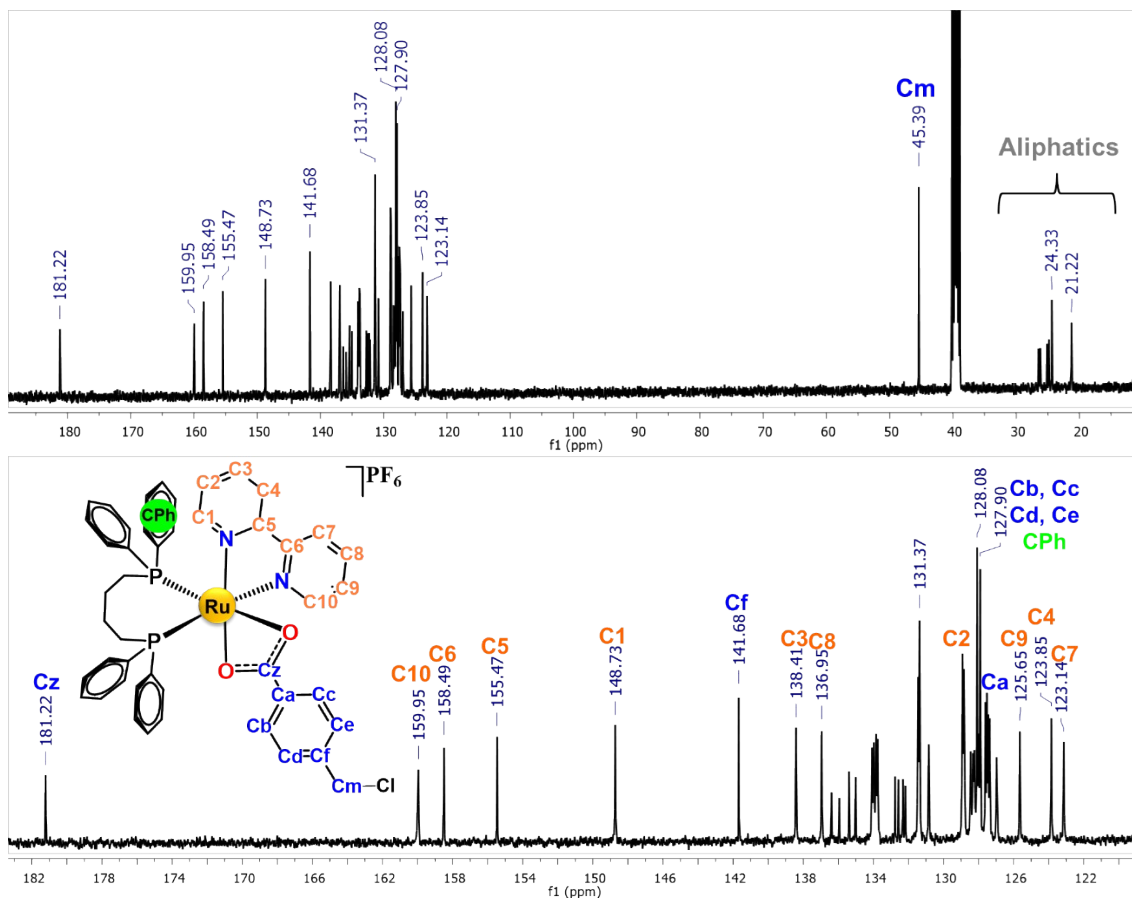

Figure S22. NMR  $^{13}\text{C}$  spectra and structure of complex **RuCCI**, in  $\text{DMSO-d}_6$ .

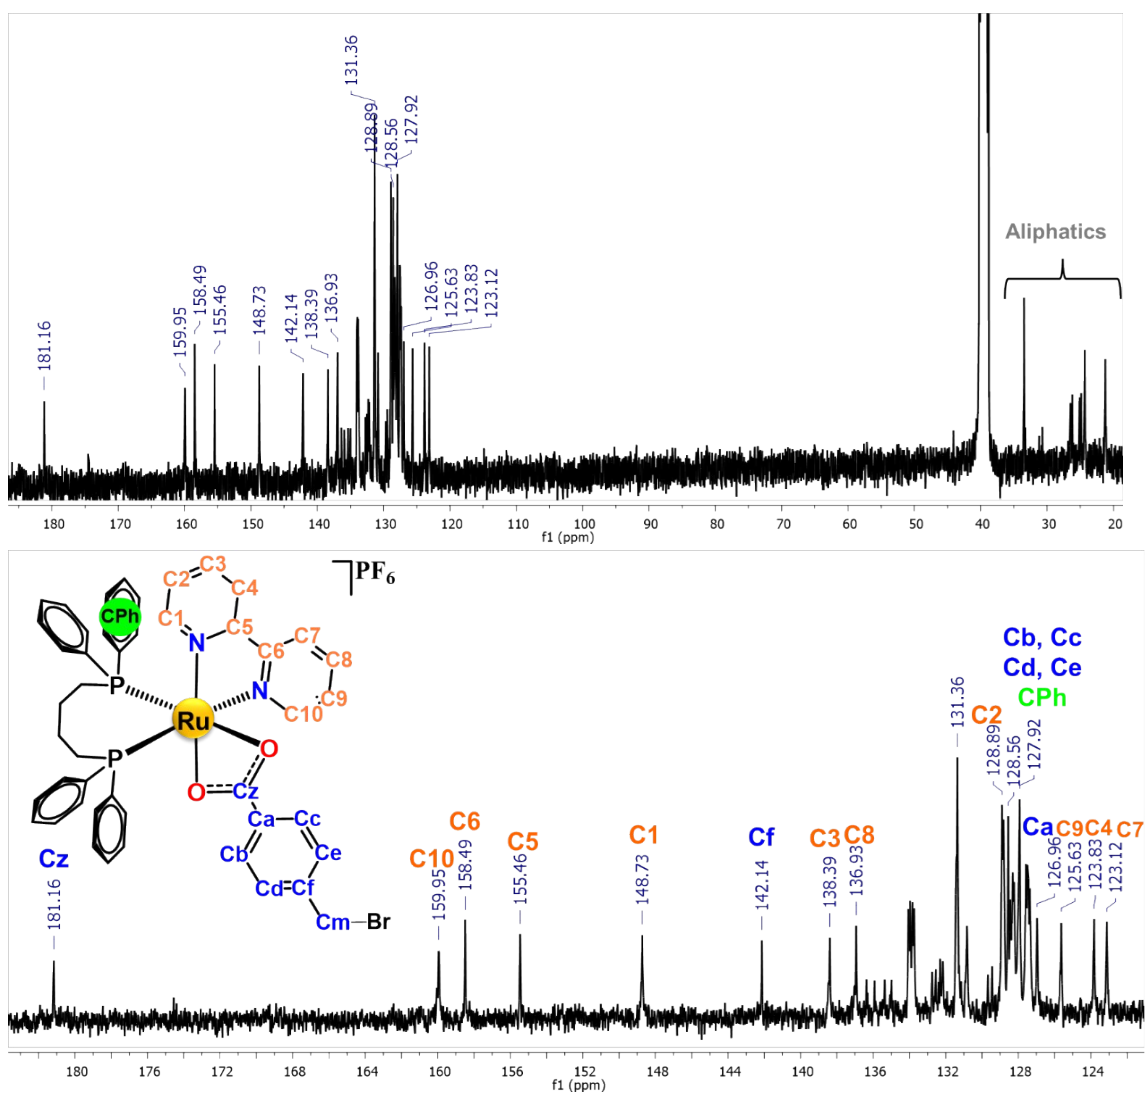

Figure S 23. NMR  $^{13}\text{C}$  spectra and structure of complex  $\text{RuCBr}$ , in  $\text{DMSO-d}_6$ .

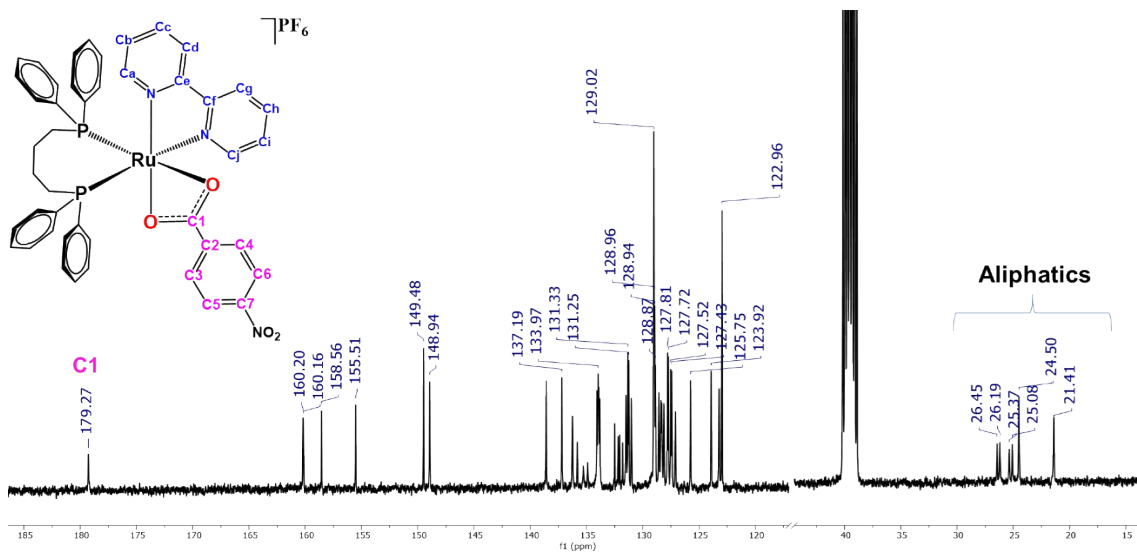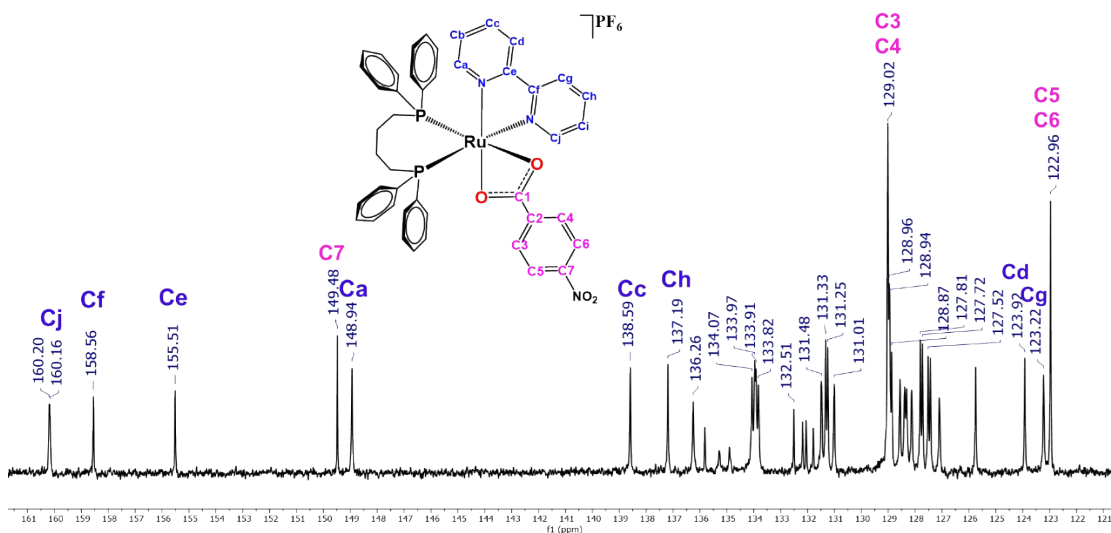

Figure S 24. NMR  $^{13}\text{C}$  spectra and structure of complex  $\text{RuNO}_2$ , in  $\text{DMSO-d}_6$ .

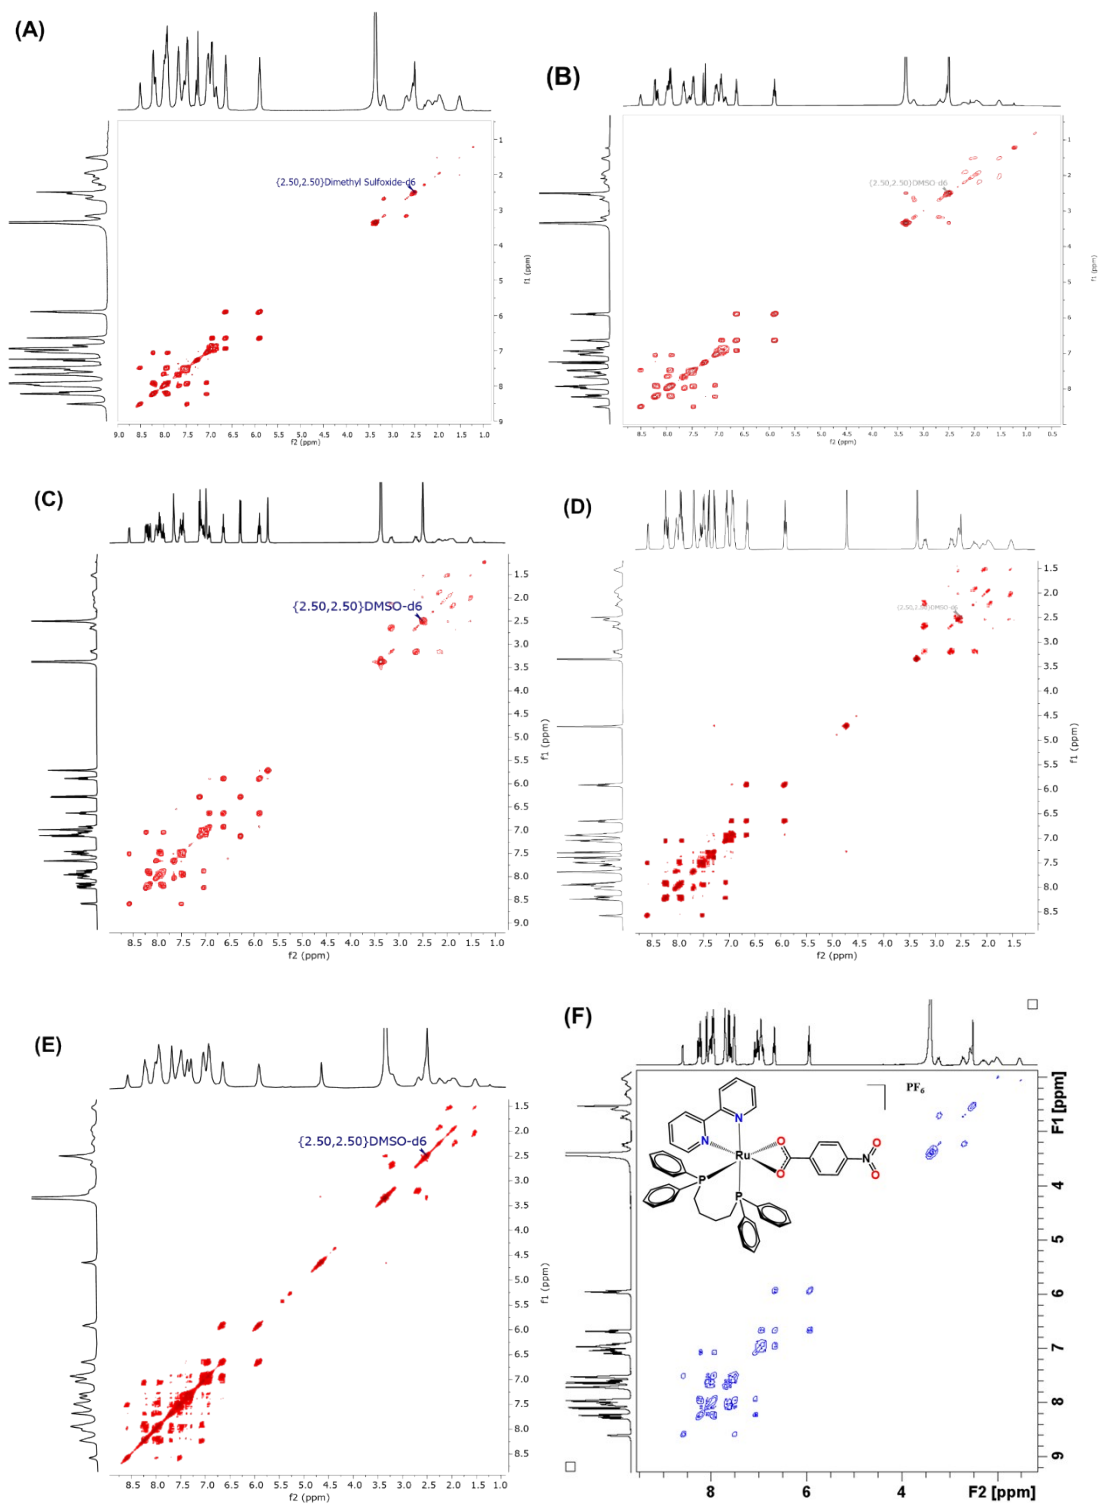

Figure S25. COSY  $^1\text{H}$ - $^1\text{H}$  NMR spectra of complexes (A) **RuBi**, (B) **RuMo**, (C) **RuNH<sub>2</sub>**, (D) **RuCCl** and (E) **RuCBr**, in  $\text{DMSO-d}_6$ .

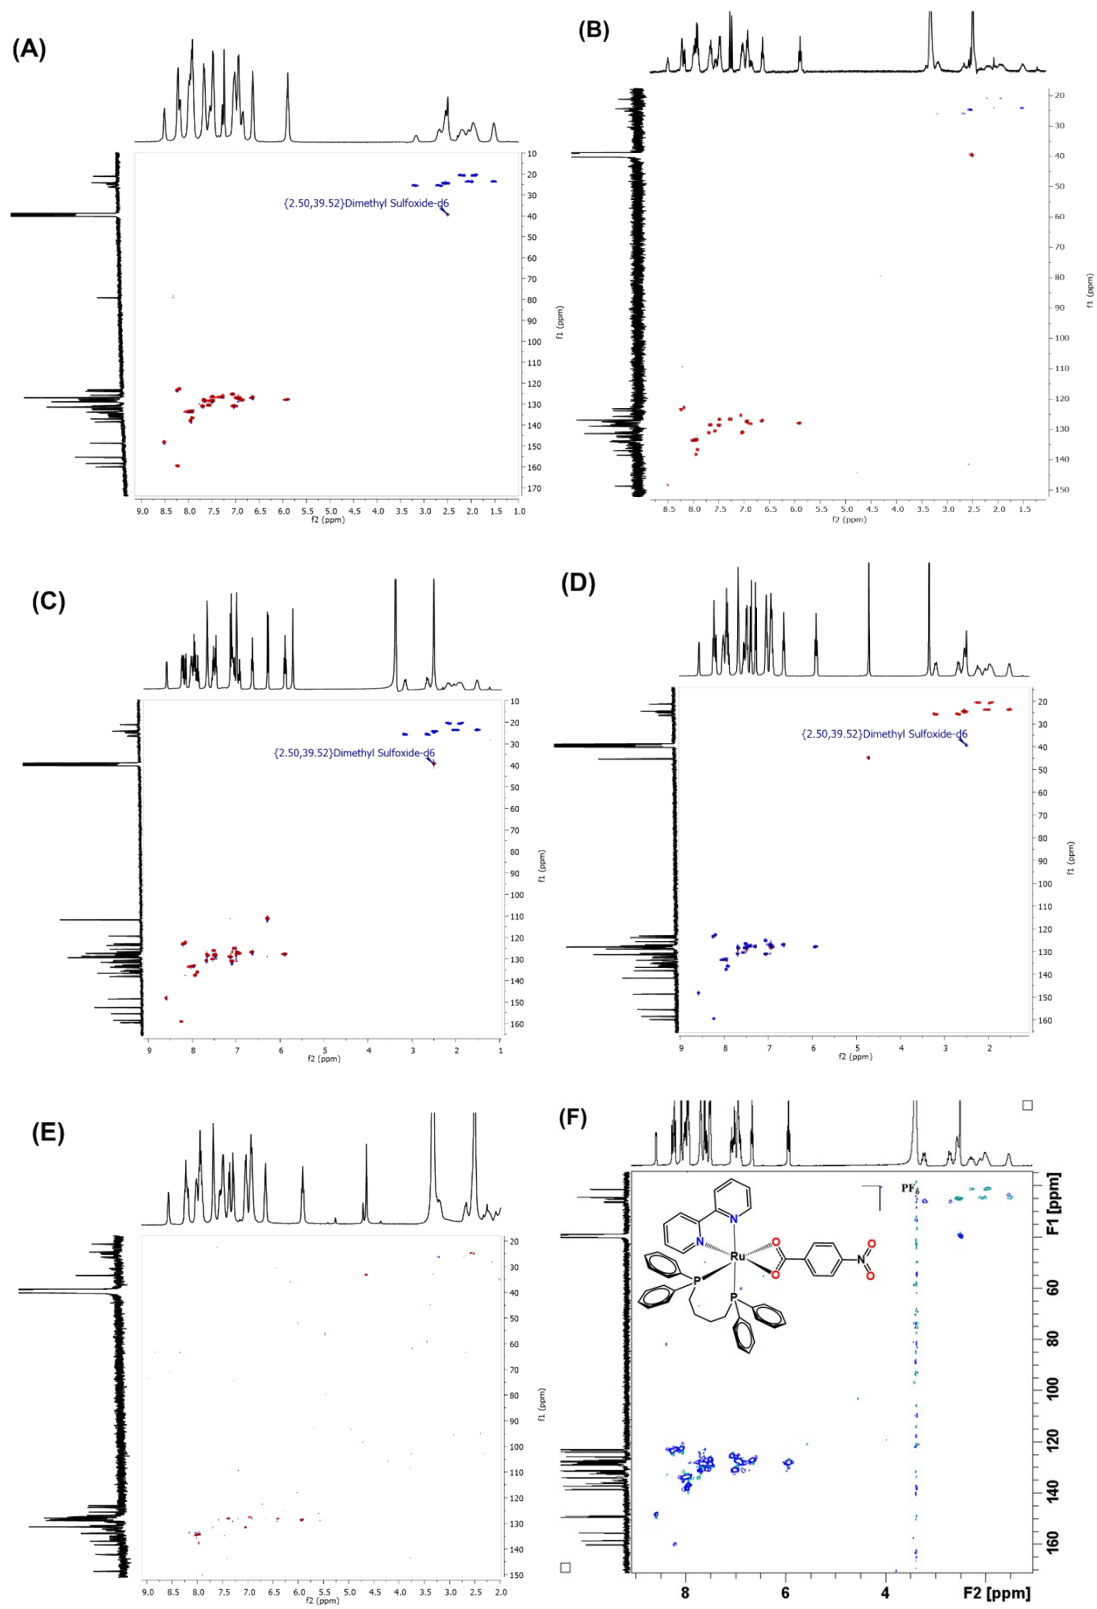

Figure S26.  $^1\text{H}$ - $^{13}\text{C}$  HSQC NMR of complexes (A) RuBi; (B) RuMo; (C) RuNH $_2$ ; (D) RuCCI and (E) RuCBr, in  $\text{DMSO-d}_6$ .

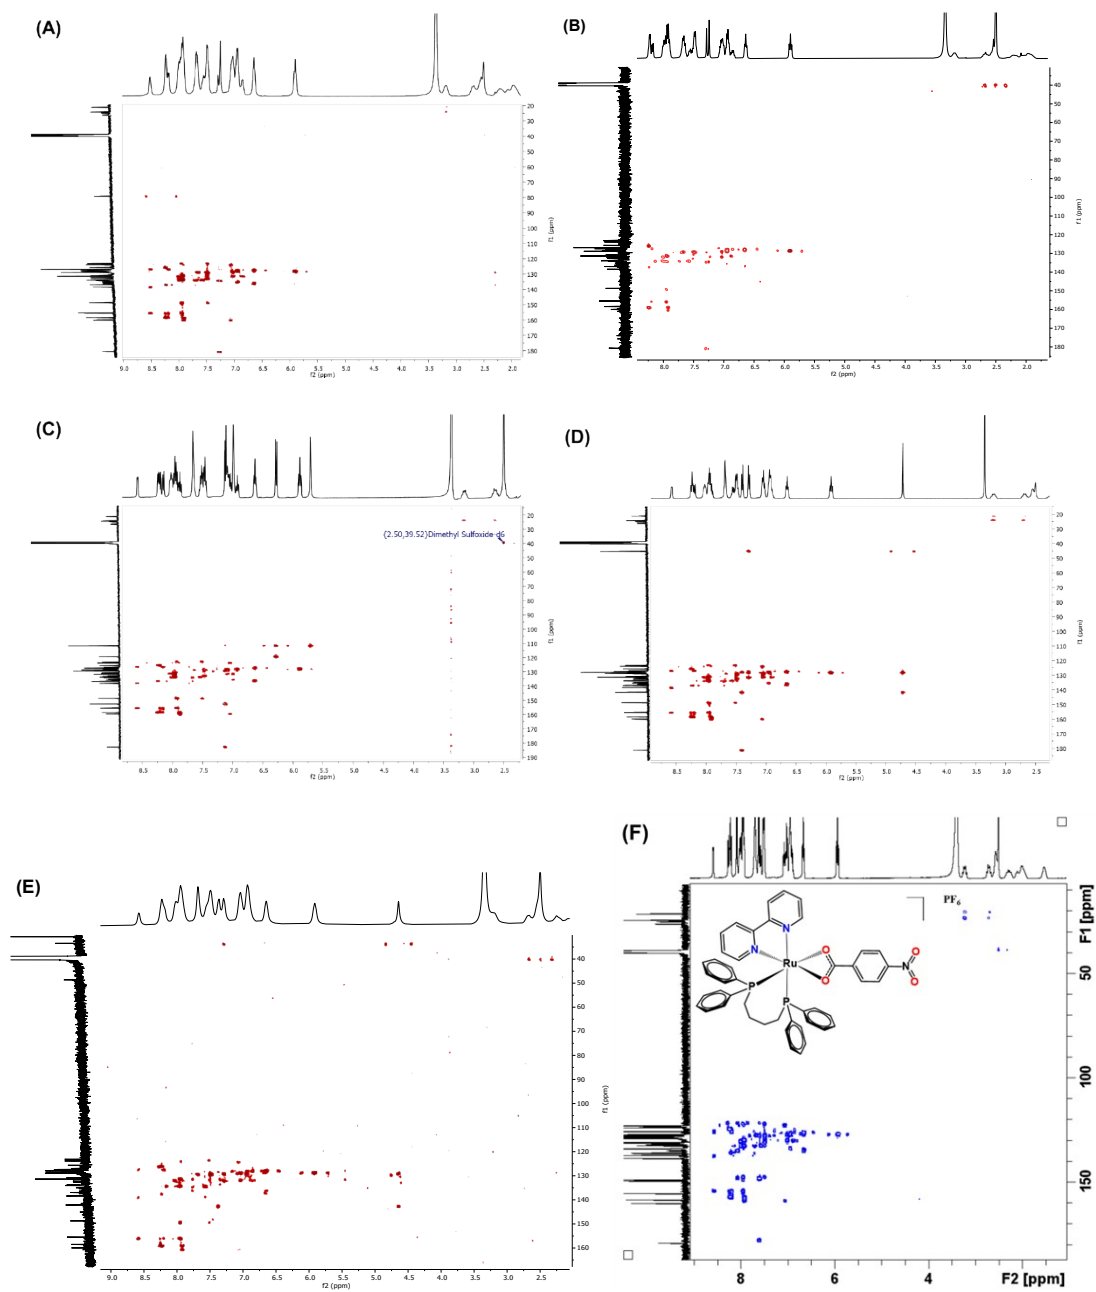

Figure S27.  $^1\text{H}$ - $^{13}\text{C}$  HMBC NMR of complexes (A) **RuBi**, (B) **RuMo**, (C) **RuNH<sub>2</sub>**, (D) **RuCCI** and (E) **RuCBr**, in  $\text{DMSO-d}_6$ .

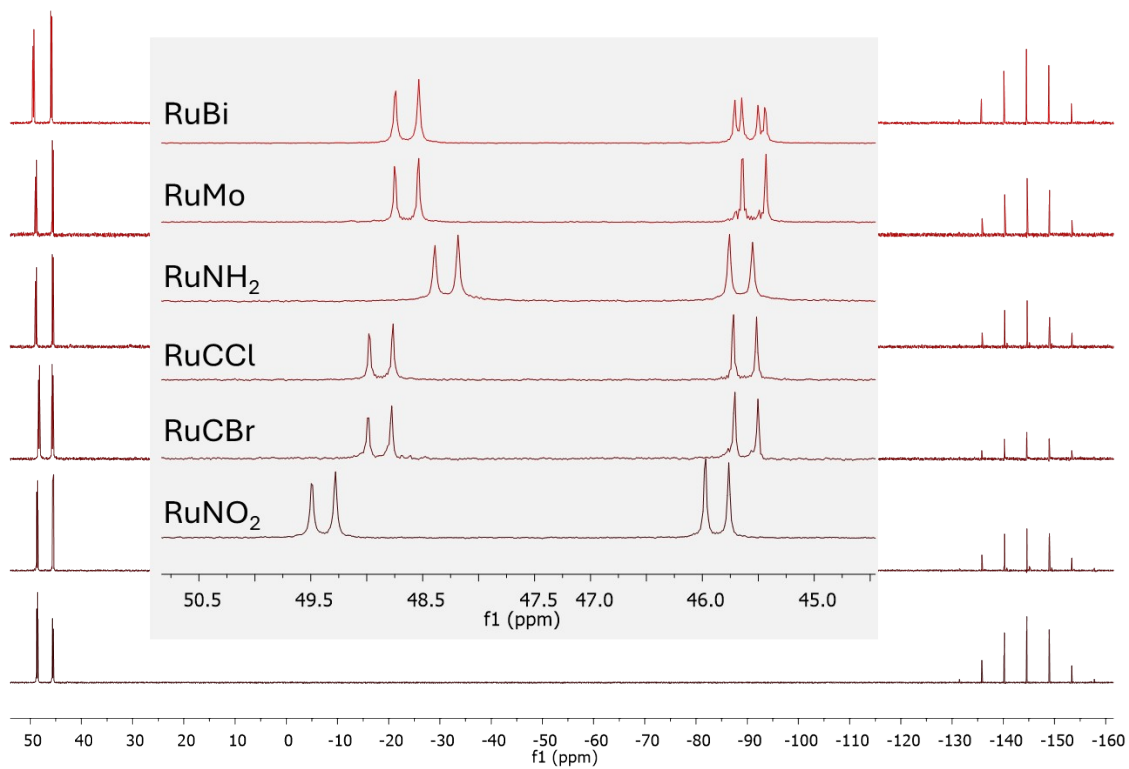

Figure S28.  $^{31}\text{P}\{^1\text{H}\}$  NMR spectra of **Ru** complexes, in  $\text{CH}_2\text{Cl}_2$  (with  $\text{D}_2\text{O}$  capillary).

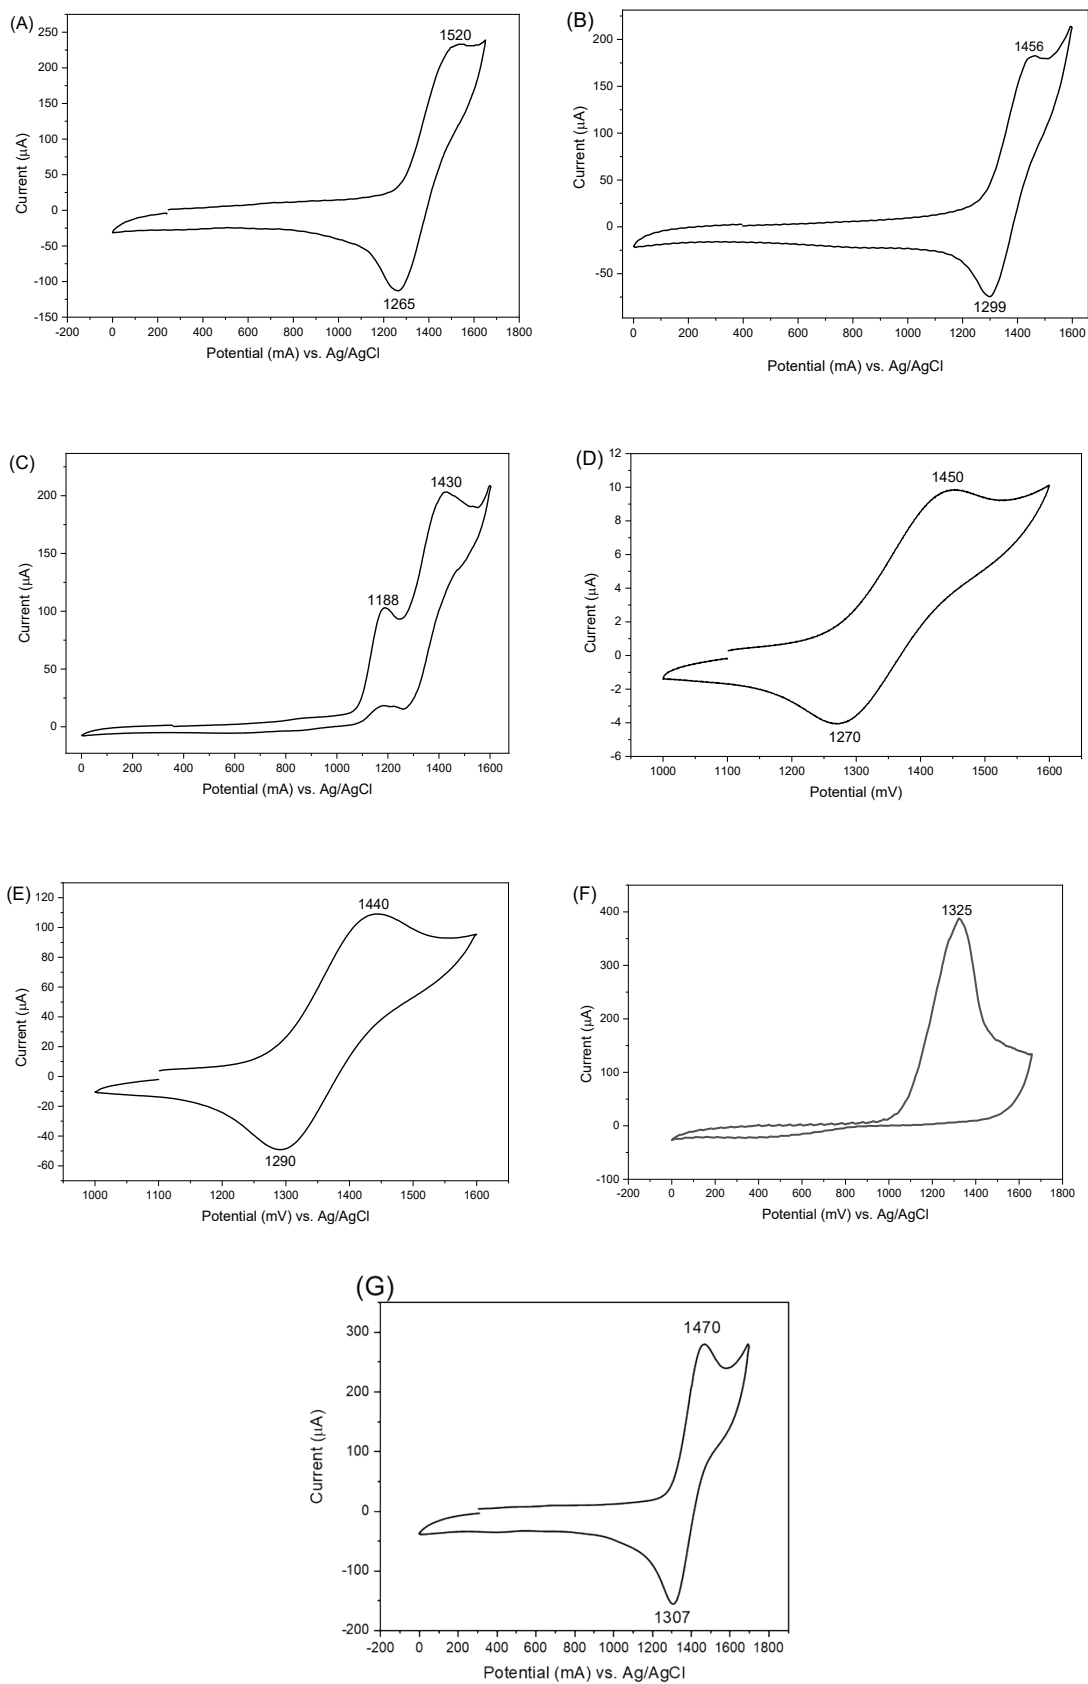

Figure S29. Cyclic voltammogram for complexes (A) **RuBi**, (B) **RuMo**, (C) **RuNH<sub>2</sub>**, (D) **RuCCl**, (E) **RuCBr**, ligand (F) L-NH<sub>2</sub> and (G) **RuNO<sub>2</sub>** in  $\text{CH}_2\text{Cl}_2$  (Tetrabutylammonium perchlorate 0.1 M; Ag/AgCl; work electrode Pt;  $100 \text{ mV s}^{-1}$ ).



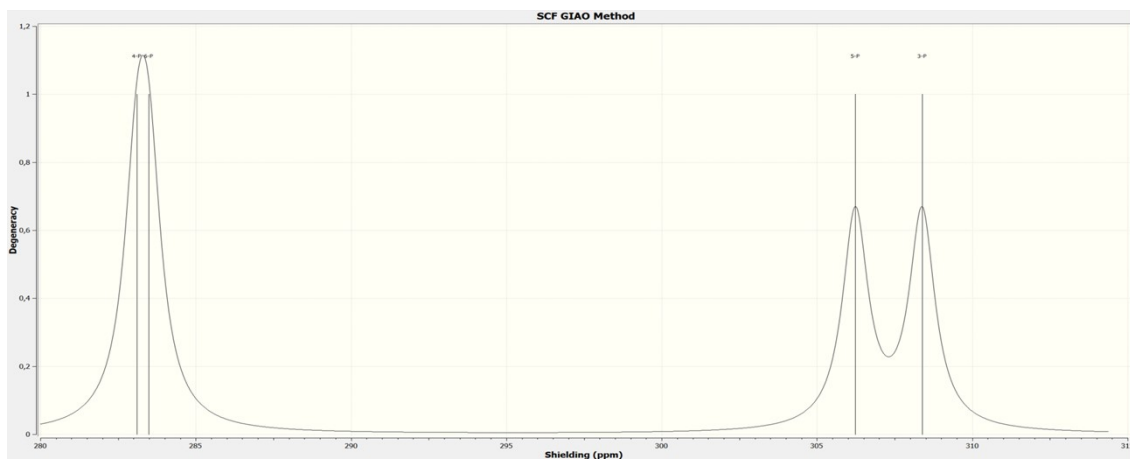

Figure S30. Simulated  $^{31}\text{P}$  NMR spectrum for conformer 1. Calculated using the GIAO method at the B3LYP/def2-SVP level of theory. Four phosphorus signals are observed, with two nearly overlapping resonances indicating a pair of chemically equivalent P

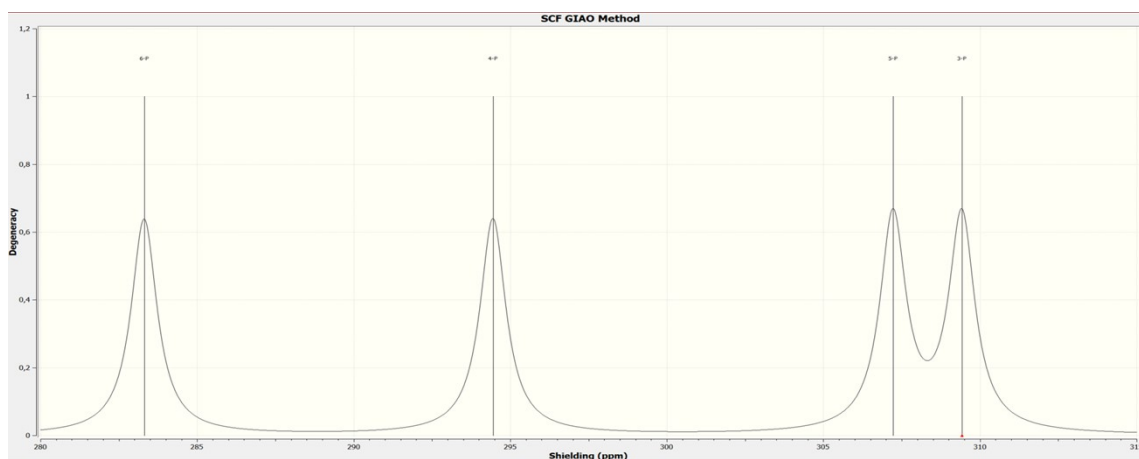

environments in conformer 1.

Figure 31. Simulated  $^{31}\text{P}$  NMR spectrum for conformer 2. Calculated using the GIAO method at the B3LYP/def2-SVP level of theory. The spectrum shows four distinct phosphorus resonances consistent with inequivalent P environments in conformer 2.

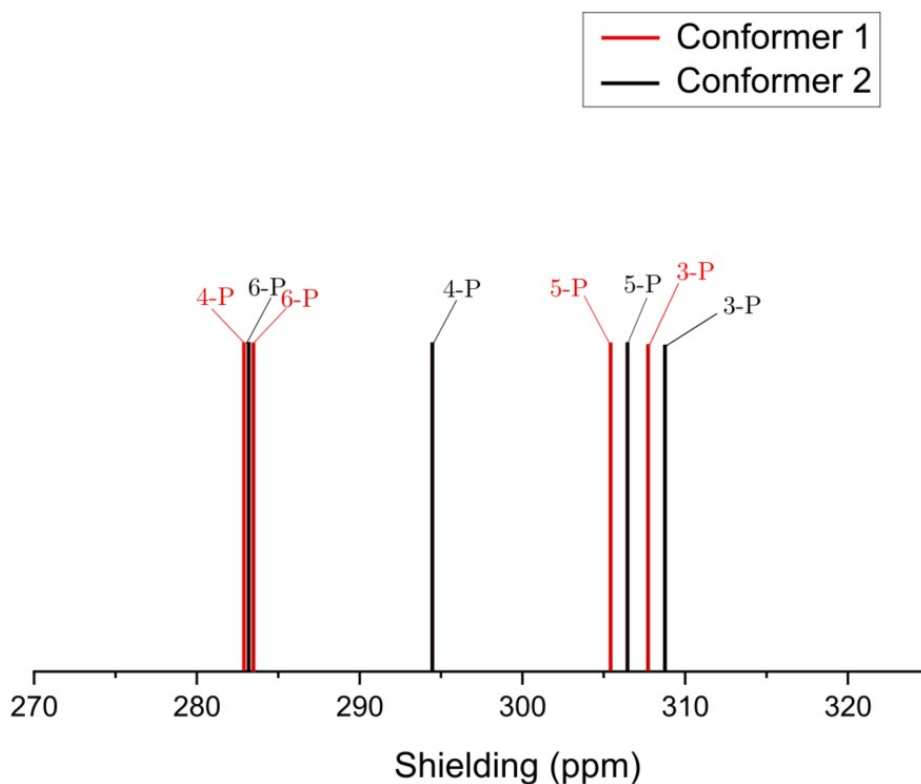

Figure S32. Superposition of the simulated  $^{31}\text{P}$  NMR spectra for conformers 1 and 2. Comparison of the calculated chemical shielding values obtained using the GIAO method at the B3LYP/def2-SVP level of theory. Red peaks correspond to conformer 1 and black peaks to conformer 2, evidencing slight variations in the  $^{31}\text{P}$  chemical environment between the two conformers.

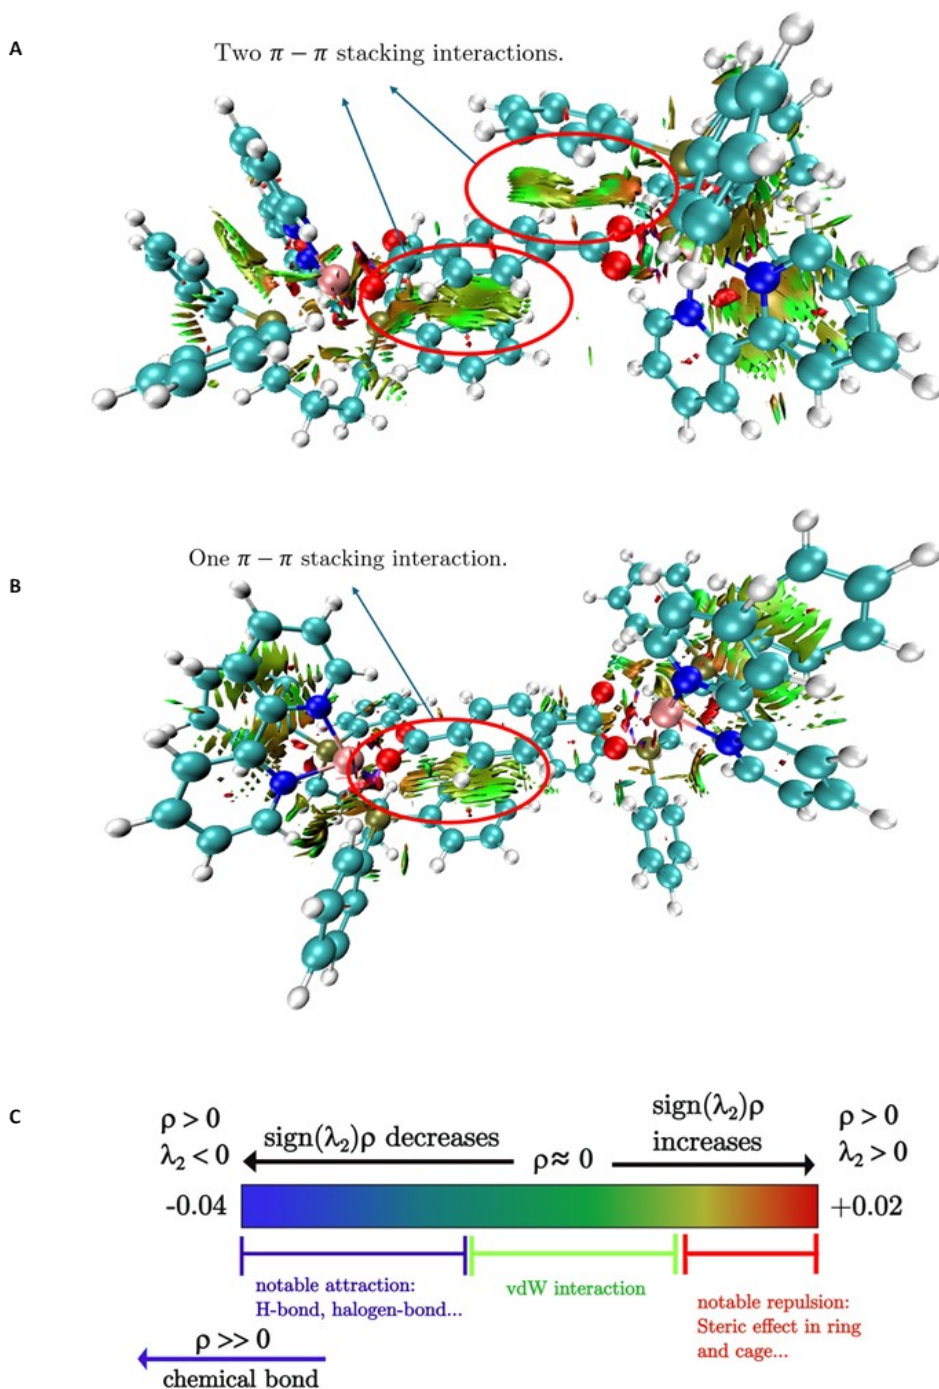

Figure S33. NCI analysis for the studied structures. (A) NCI isosurface showing two  $\pi - \pi$  stacking interactions between aromatic fragments in conformer 1. (B) NCI isosurface displaying a single  $\pi - \pi$  stacking interaction in conformer 2. (C) Colour scale for the NCI plots, where blue indicates attractive interactions, green corresponds to weak van der Waals contacts, and red denotes repulsive regions ( $\text{sign}(\lambda_2)\rho$ ).

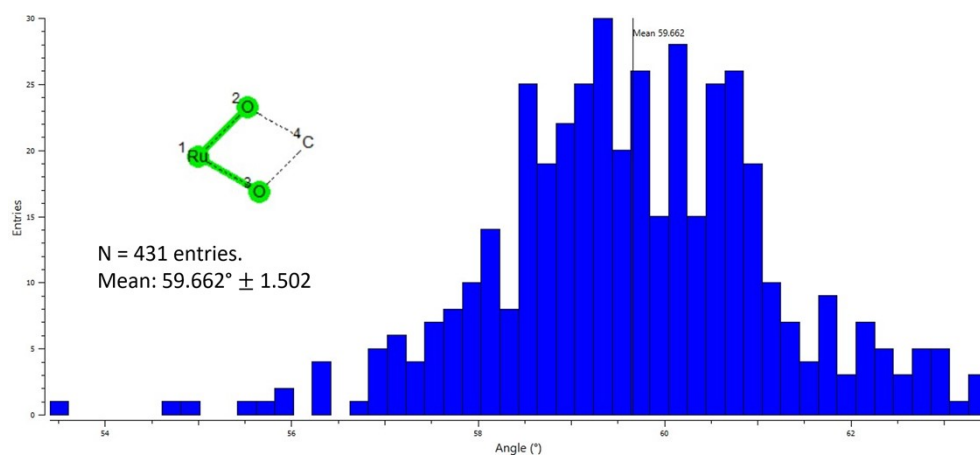

Figure S34. Values of 4-membered ring O-Ru-O angles over 431 entries in the Cambridge Structural Database (CSD).

Table S2. Crystal data and refinement details.

|                                           | <b>RuNH<sub>2</sub></b>                                                                     | <b>RuCBr</b>                                                                                            | <b>RuBi</b>                                                                                                        | <b>RuNO<sub>2</sub></b>                                                               |
|-------------------------------------------|---------------------------------------------------------------------------------------------|---------------------------------------------------------------------------------------------------------|--------------------------------------------------------------------------------------------------------------------|---------------------------------------------------------------------------------------|
| CCDC code                                 | 2487110                                                                                     | 2487109                                                                                                 | 2487111                                                                                                            | 2513690                                                                               |
| Empirical formula                         | C <sub>46.25</sub> H <sub>47</sub> F <sub>6</sub> N <sub>3</sub> O<br>3.25P <sub>3</sub> Ru | C <sub>46</sub> H <sub>42.6</sub> BrF <sub>6</sub><br>N <sub>2</sub> O <sub>2.3</sub> P <sub>3</sub> Ru | C <sub>84</sub> H <sub>76</sub> F <sub>11.98</sub> N <sub>4</sub><br>O <sub>6</sub> P <sub>6</sub> Ru <sub>2</sub> | C <sub>45</sub> H <sub>40</sub> F <sub>6</sub> N <sub>3</sub> O <sub>4</sub> P<br>3Ru |
| Formula weight /g mol <sup>-1</sup>       | 1004.85                                                                                     | 1.048.143                                                                                               | 1857.548                                                                                                           | 994.78                                                                                |
| Temperature /K                            | 293(2)                                                                                      | 100.1(3)                                                                                                | 100.00(14)                                                                                                         | 100.0(3)                                                                              |
| Crystal system                            | Triclinic                                                                                   | monoclinic                                                                                              | Monoclinic                                                                                                         | triclinic                                                                             |
| Space group                               | P-1                                                                                         | P21/c                                                                                                   | I2/a                                                                                                               | P-1                                                                                   |
| a/Å                                       | 11.6936(3)                                                                                  | 15.7262(1)                                                                                              | 29.52159(11)                                                                                                       | 12.8108(3)                                                                            |
| b/Å                                       | 13.4117(4)                                                                                  | 14.8624(1)                                                                                              | 12.88956(6)                                                                                                        | 13.9903(2)                                                                            |
| c/Å                                       | 15.3031(4)                                                                                  | 19.3587(1)                                                                                              | 43.88249(18)                                                                                                       | 14.5427(3)                                                                            |
| α/°                                       | 106.669(2)                                                                                  | 90                                                                                                      | 90                                                                                                                 | 65.487(2)                                                                             |
| β/°                                       | 97.953(2)                                                                                   | 99.520(1)                                                                                               | 96.7437(4)                                                                                                         | 66.110(2)                                                                             |
| γ/°                                       | 90.324(2)                                                                                   | 90                                                                                                      | 90                                                                                                                 | 73.459(2)                                                                             |
| Volume/Å <sup>3</sup>                     | 2274.43(11)                                                                                 | 4462.38(5)                                                                                              | 16582.65(12)                                                                                                       | 2146.91(9)                                                                            |
| Z                                         | 2                                                                                           | 4                                                                                                       | 8                                                                                                                  | 2                                                                                     |
| ρ <sub>calc</sub> /g/cm <sup>3</sup>      | 1.467                                                                                       | 1.560                                                                                                   | 1.459                                                                                                              | 1.539                                                                                 |
| μ/mm <sup>-1</sup>                        | 0.519                                                                                       | 5.486                                                                                                   | 4.721                                                                                                              | 4.652                                                                                 |
| F(000)                                    | 1029.0                                                                                      | 2124                                                                                                    | 7446.8                                                                                                             | 1012.0                                                                                |
| Crystal size/mm <sup>3</sup>              | 0.105 X 0.048<br>X 0.012                                                                    | 0.12 × 0.09 ×<br>0.04                                                                                   | 0.21 X 0.11 X<br>0.05                                                                                              | 0.09 × 0.07 ×<br>0.03                                                                 |
| Radiation                                 | Mo Kα (λ =<br>0.71073)                                                                      | Cu Kα (λ =<br>1.54184)                                                                                  | Cu Kα (λ =<br>1.54184)                                                                                             | Cu Kα (λ =<br>1.54184)                                                                |
| 2θ range for data collection/°            | 5.198 to<br>69.136                                                                          | 8.98 to 140.14                                                                                          | 9.18 to 140.14                                                                                                     | 9.612 to<br>140.14                                                                    |
| Index ranges                              | -18 ≤ h ≤ 18, -<br>20 ≤ k ≤ 21, -<br>24 ≤ l ≤ 23                                            | -20 ≤ h ≤ 19, -<br>18 ≤ k ≤ 18, -<br>20 ≤ l ≤ 24                                                        | -29 ≤ h ≤ 37, -<br>16 ≤ k ≤ 16, -<br>55 ≤ l ≤ 55                                                                   | -15 ≤ h ≤ 15, -<br>17 ≤ k ≤ 16, -<br>17 ≤ l ≤ 17                                      |
| Reflections collected                     | 74606                                                                                       | 63786                                                                                                   | 96366                                                                                                              | 41358                                                                                 |
| Independent reflections                   | 18179 [R <sub>int</sub> =<br>0.0392, R <sub>sigma</sub> =<br>0.0363]                        | 8467 [R <sub>int</sub> =<br>0.0283,<br>R <sub>sigma</sub> =<br>0.0210]                                  | 15726 [R <sub>int</sub> =<br>0.0319, R <sub>sigma</sub> =<br>0.0252]                                               | 8120 [R <sub>int</sub> =<br>0.0472, R <sub>sigma</sub> =<br>0.0397]                   |
| Data/restraints/parameters                | 18179/105/542                                                                               | 8467/373/799                                                                                            | 15726/72/1043                                                                                                      | 8120/0/559                                                                            |
| Goodness-of-fit on F <sup>2</sup>         | 1.051                                                                                       | 1.054                                                                                                   | 1.044                                                                                                              | 1.029                                                                                 |
| Final R indexes [I ≥ 2σ(I)]               | R <sub>1</sub> = 0.0544,<br>wR <sub>2</sub> = 0.1414                                        | R <sub>1</sub> = 0.0459,<br>wR <sub>2</sub> = 0.1313                                                    | R <sub>1</sub> = 0.0420,<br>wR <sub>2</sub> = 0.1189                                                               | R <sub>1</sub> = 0.0415,<br>wR <sub>2</sub> = 0.1130                                  |
| Final R indexes [all data]                | R <sub>1</sub> = 0.0853,<br>wR <sub>2</sub> = 0.1685                                        | R <sub>1</sub> = 0.0476,<br>wR <sub>2</sub> = 0.1329                                                    | R <sub>1</sub> = 0.0448,<br>wR <sub>2</sub> = 0.1211                                                               | R <sub>1</sub> = 0.0457,<br>wR <sub>2</sub> = 0.1164                                  |
| Largest diff. peak/hole/e Å <sup>-3</sup> | 1.23/-1.39                                                                                  | 1.20/-3.59                                                                                              | 1.65/-0.64                                                                                                         | 1.46/-0.99                                                                            |

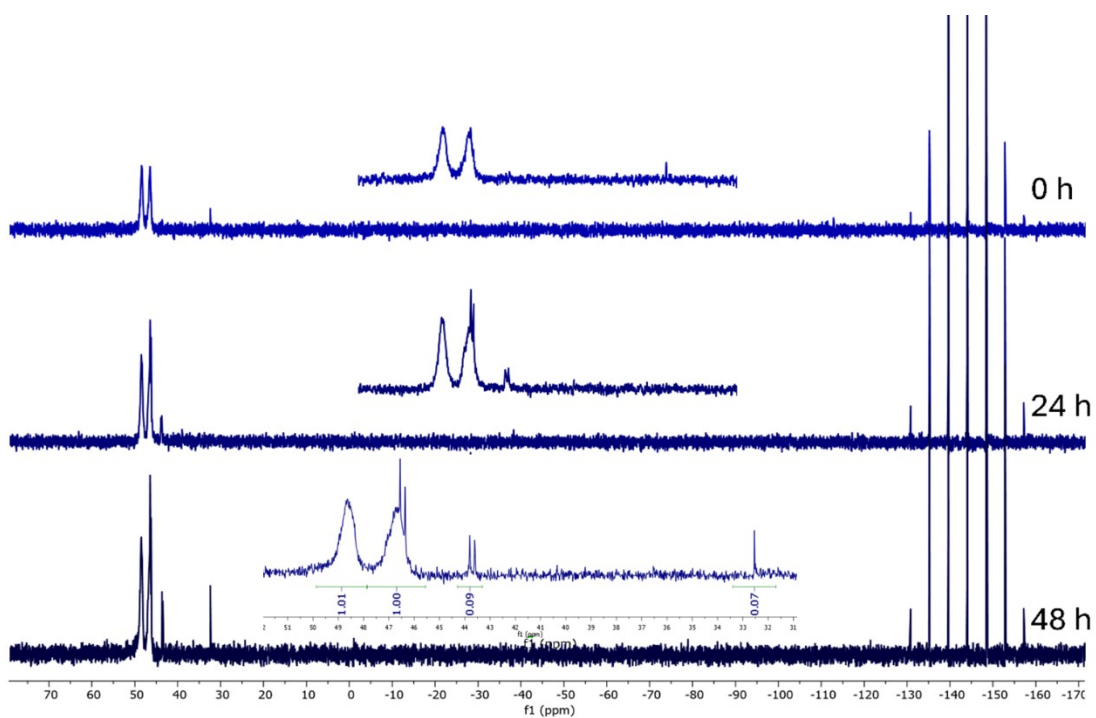

Figure S35.  $^{31}\text{P}\{^1\text{H}\}$  NMR spectra of the complex **RuBi** in DMSO/10% RPMI culture medium, in 0, 24, and 48 h.

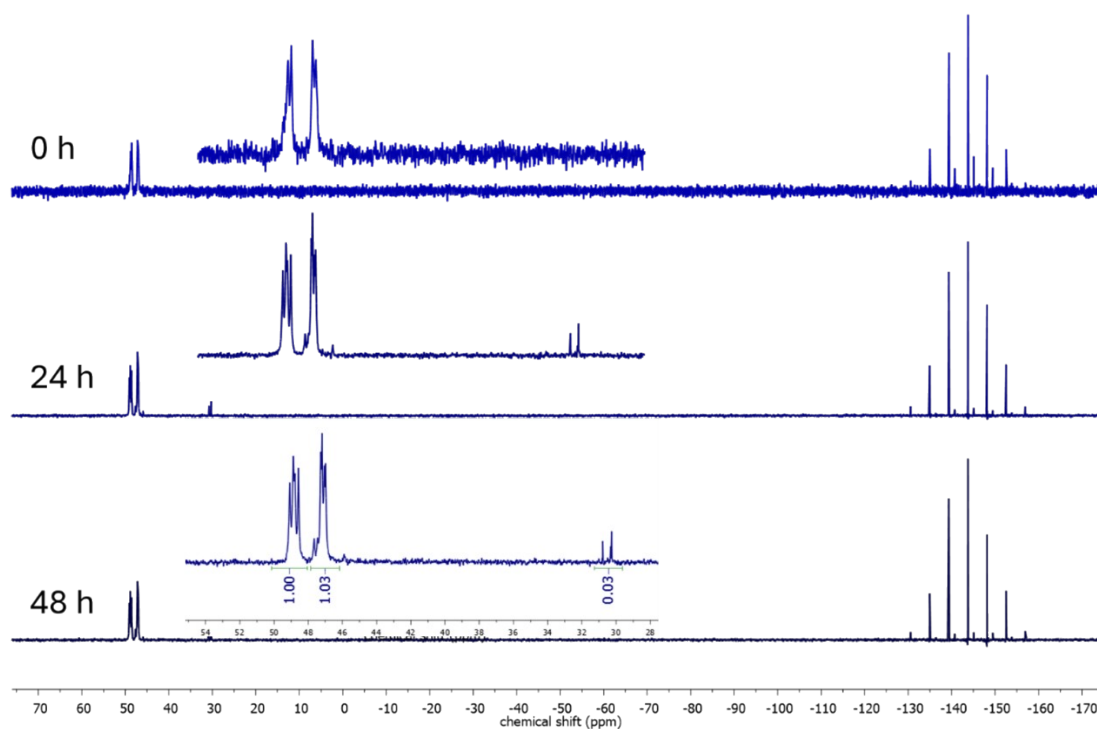

Figure S36.  $^{31}\text{P}\{^1\text{H}\}$  NMR spectra of the complex **RuMo** in DMSO/10% RPMI culture medium, in 0, 24, and 48 h.

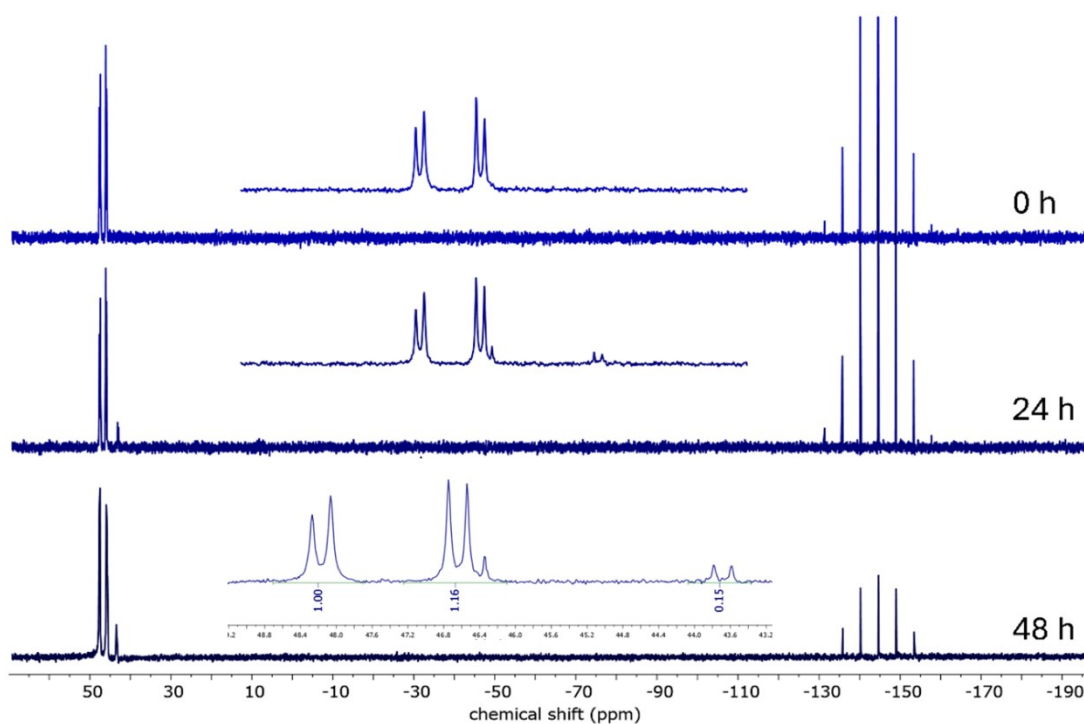

Figure S37.  $^{31}\text{P}\{^1\text{H}\}$  NMR spectra of the complex  $\text{RuNH}_2$  in DMSO/10% RPMI culture medium, in 0, 24, and 48 h.

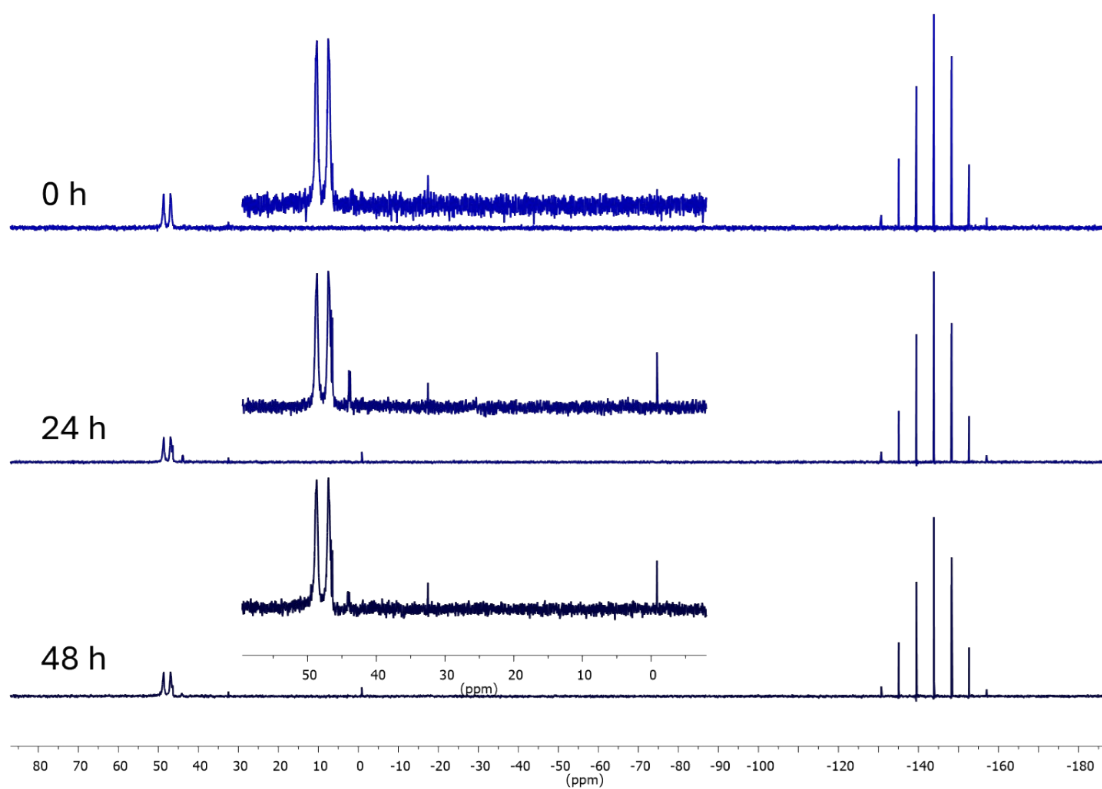

Figure S38.  $^{31}\text{P}\{^1\text{H}\}$  NMR spectra of the complex  $\text{RuCCI}$  in DMSO/10% RPMI culture medium, in 0, 24, and 48h.

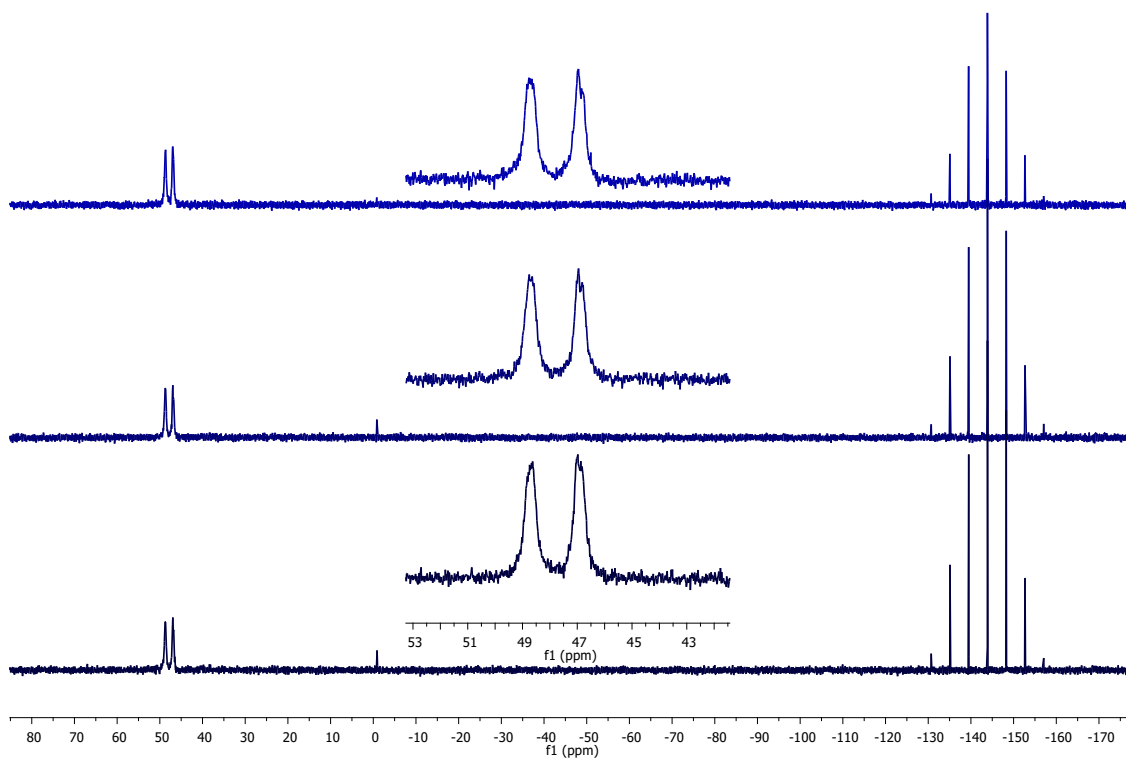

Figure S39.  $^{31}\text{P}\{^1\text{H}\}$  NMR spectra of the complex  $\text{RuCBr}$  in DMSO/10% RPMI culture medium, in 0, 24, and 48h.

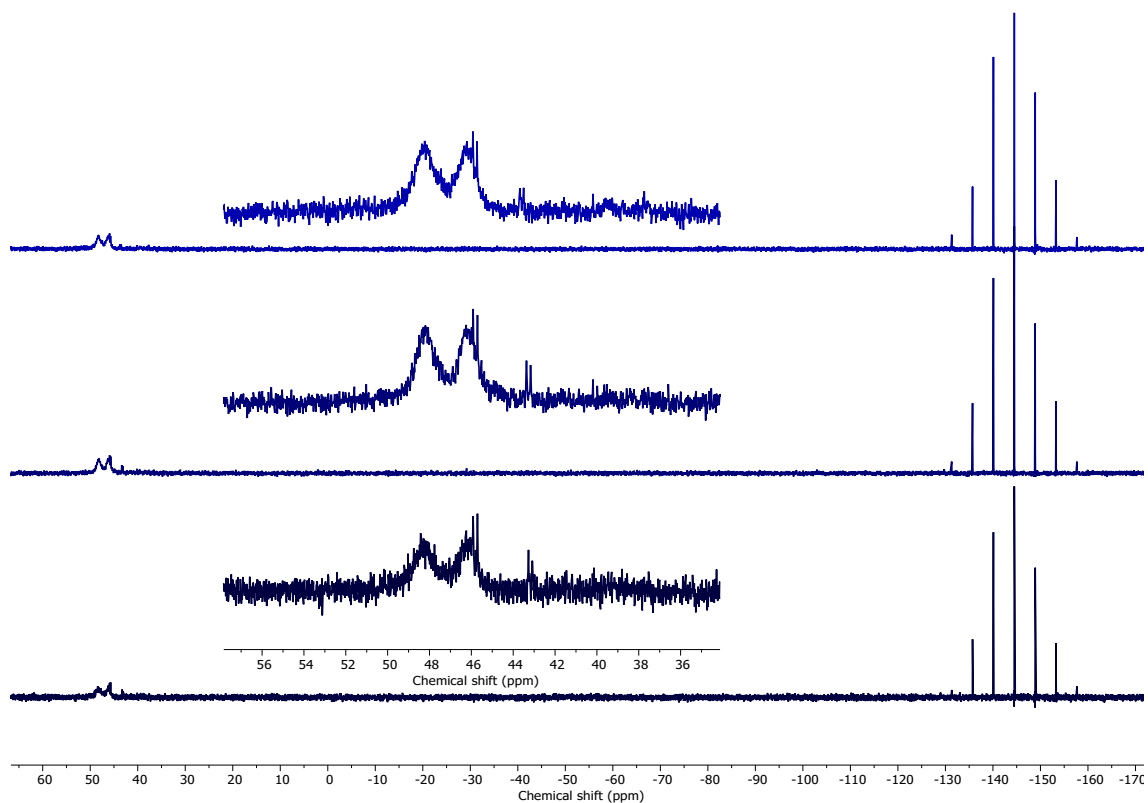

Figure S40.  $^{31}\text{P}\{^1\text{H}\}$  NMR spectra of the complex  $\text{RuNO}_2$  in DMSO/10% RPMI culture medium, in 0, 24, and 48h.

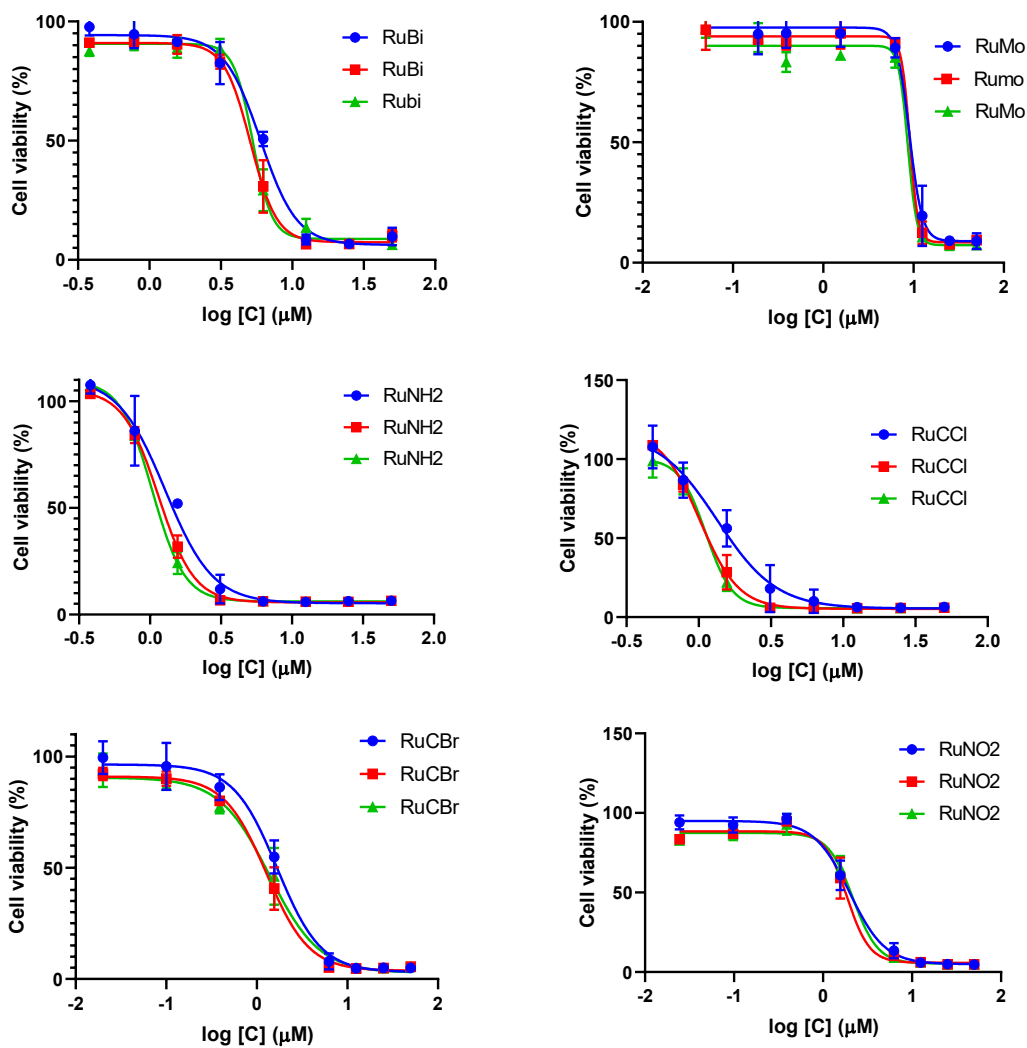

Figure S41. Concentration-response curve of tumor cells MDA-MB-231 after complexes treatment for 48 h, in triplicate.

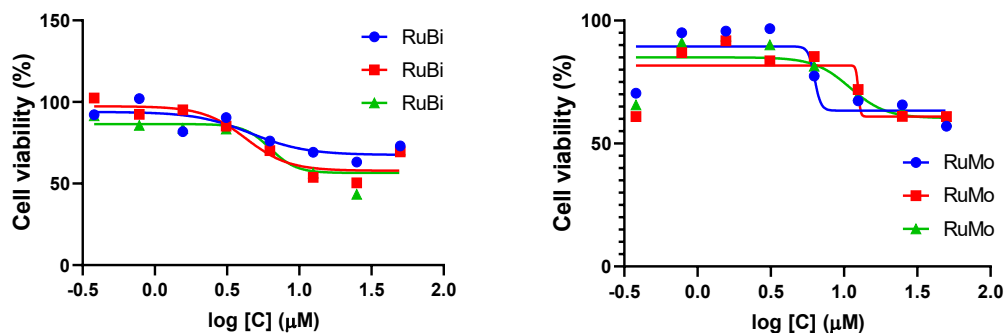

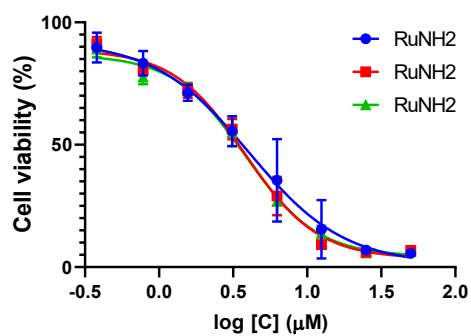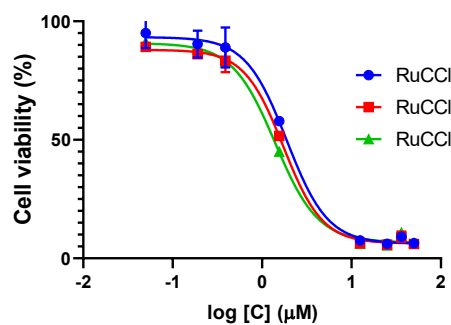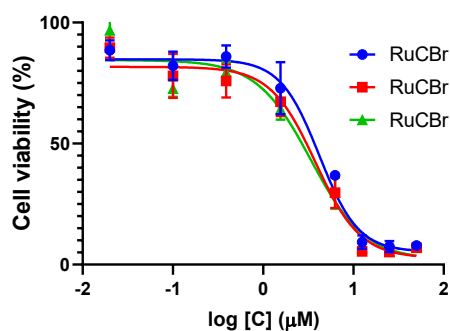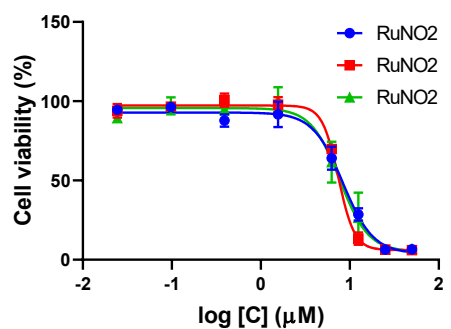

Figure S42. Concentration-response curve of tumor cells A549 after complexes treatment for 48 h, in triplicate.

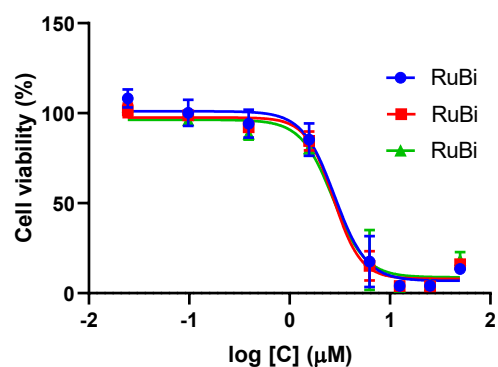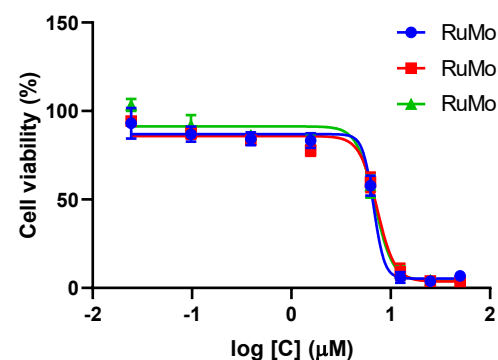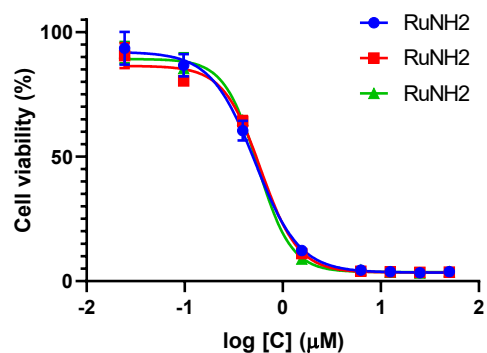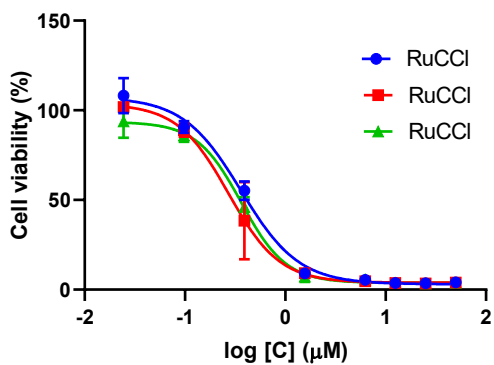

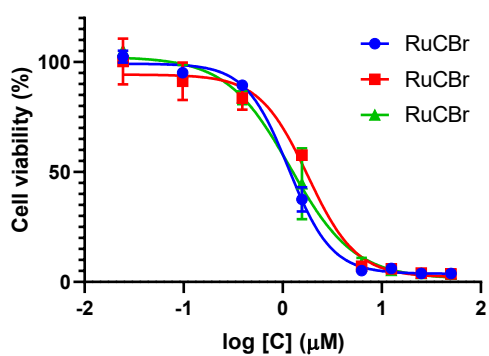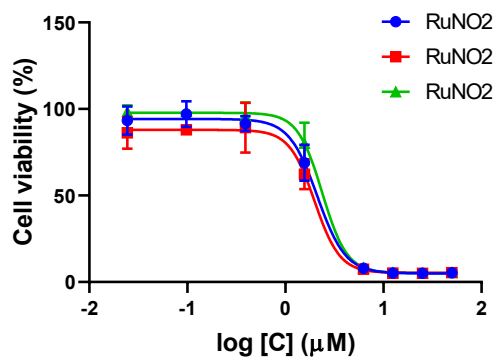

Figure S43. Concentration-response curve of tumor cells A2780 after complexes treatment for 48 h, in triplicate.

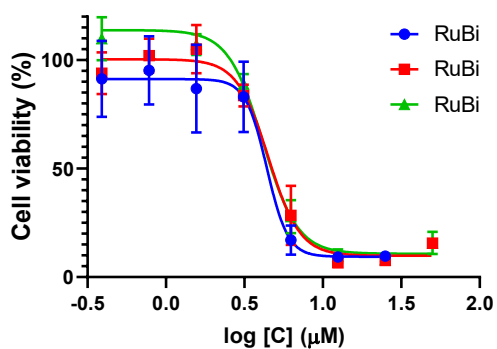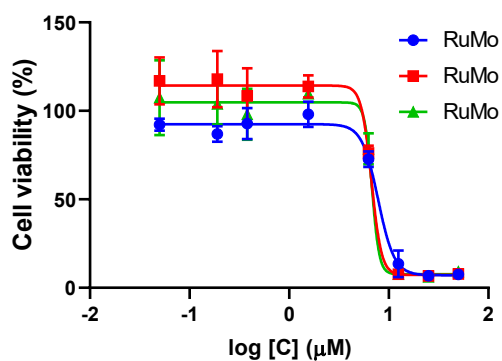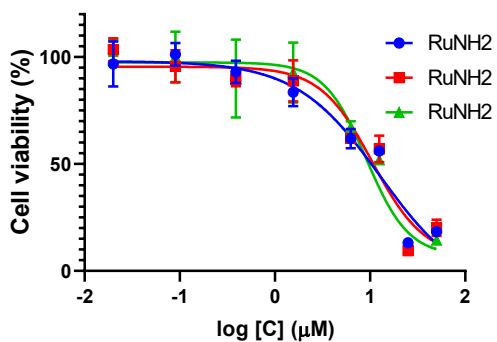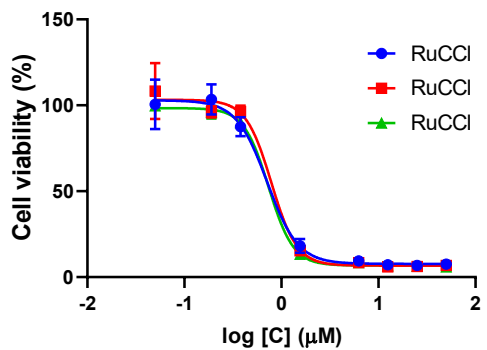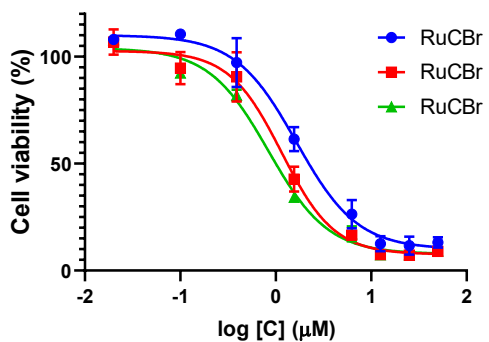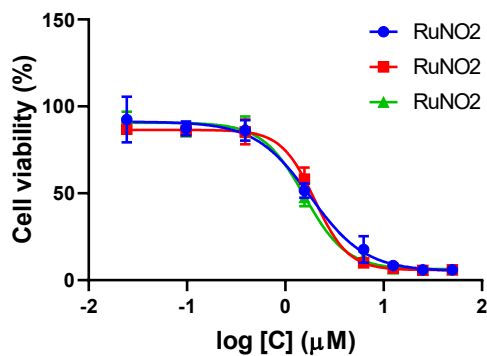

Figure S44. Concentration-response curve of tumor cells A2780cis after complexes treatment for 48 h, in triplicate.

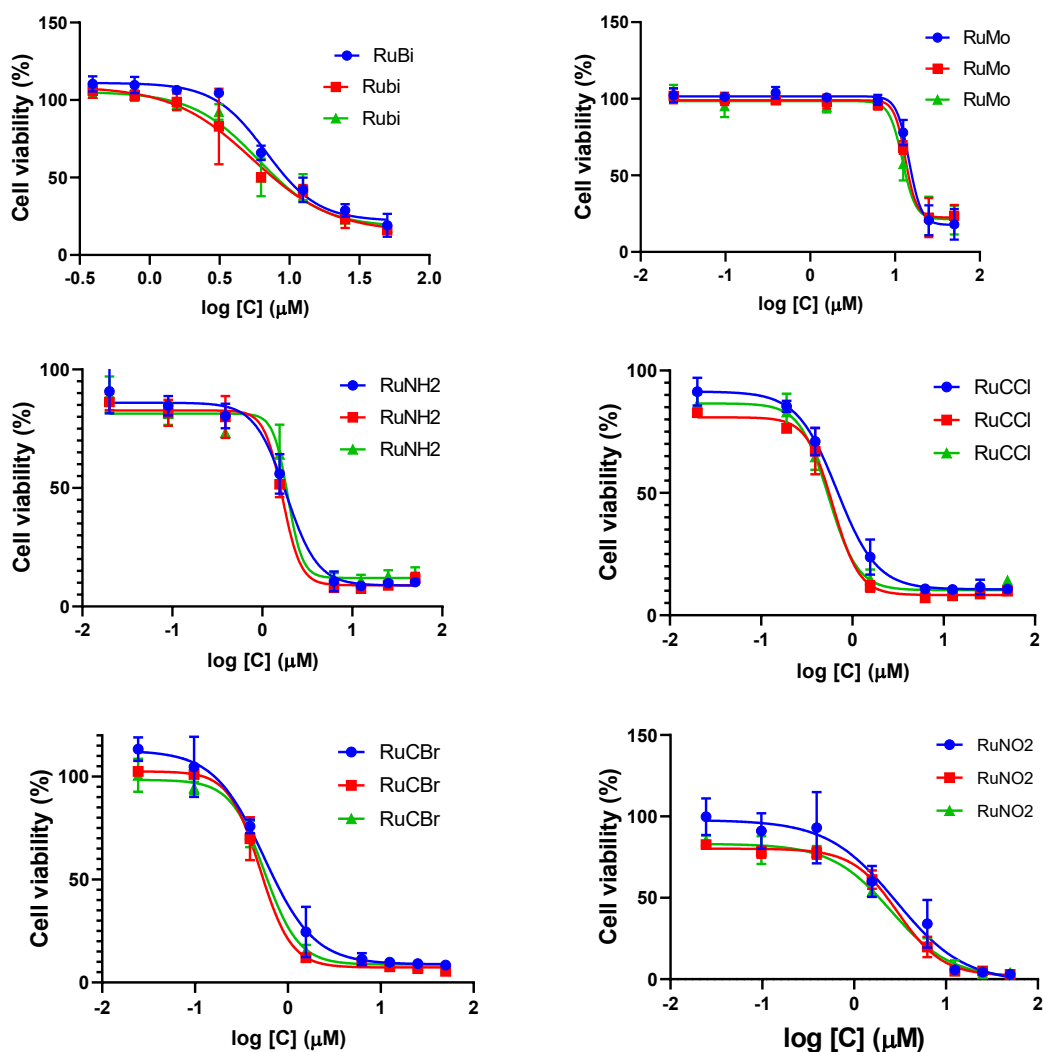

Figure S45. Concentration-response curve of non-tumor cells MRC-5 after complexes treatment for 48 h, in triplicate.

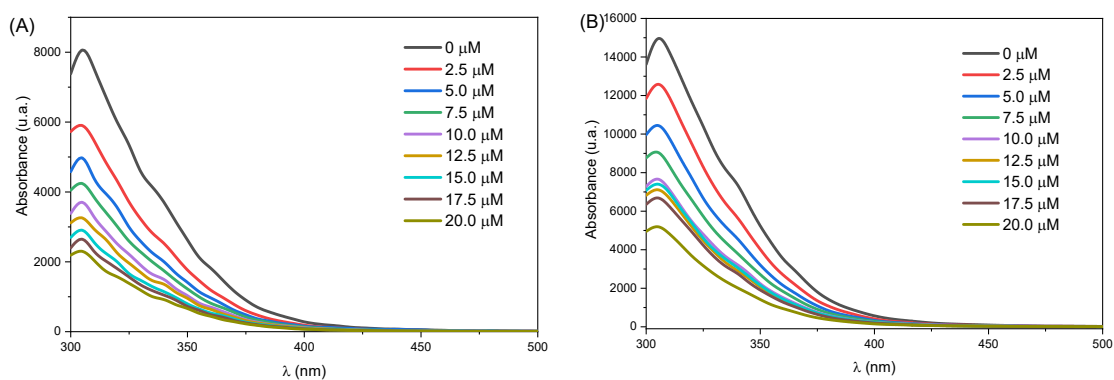

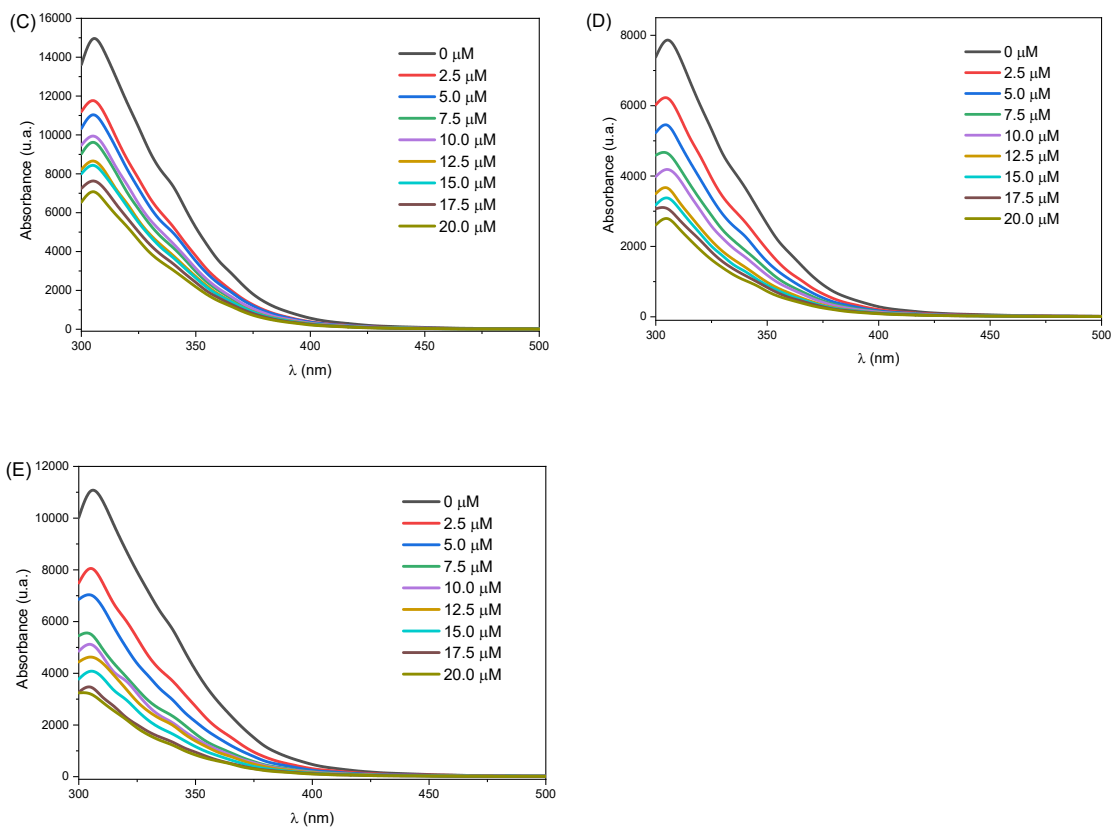

Figure S46. Fluorescence spectra of HSA solution (2.5  $\mu\text{M}$ ) in Tris-HCl buffer (0.1 M NaCl, pH 7.4) in the absence and presence of different concentrations of complexes (A) **RuBi**, (B) **RuMo**, (C) **RuCCI**, (D) **RuCBr** and (E) **RuNO<sub>2</sub>**.

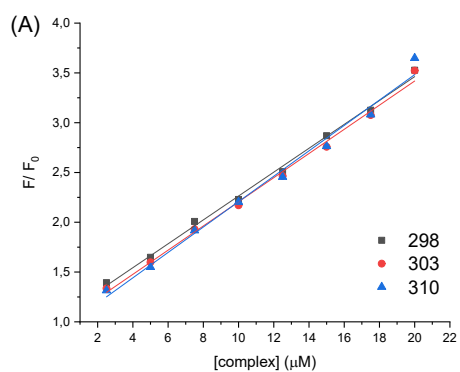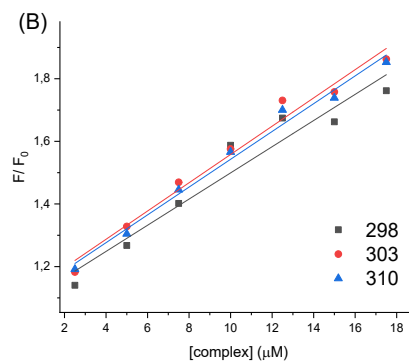

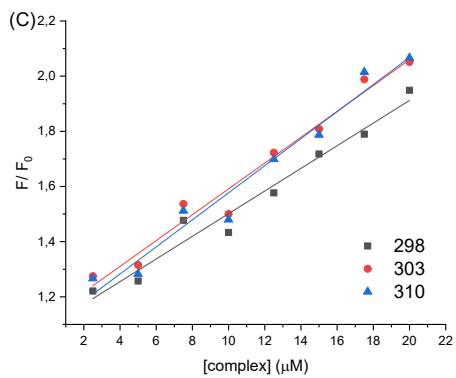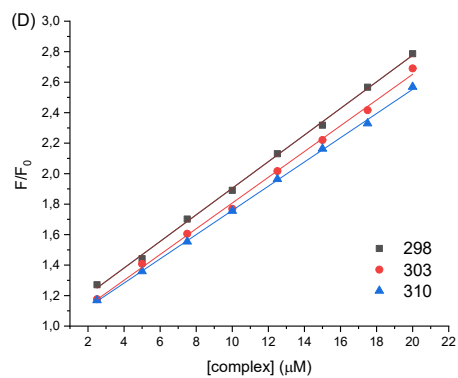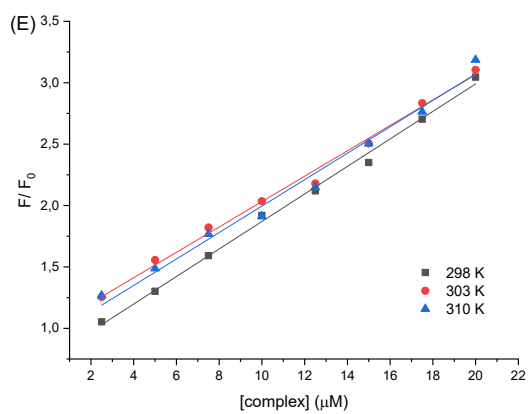

Figure S47. Stern–Volmer plots for the quenching of HSA fluorescence by complexes (A) **RuBi**, (B) **RuMo**, (C) **RuCCl** and (D) **RuCBr** and (E) **RuNO<sub>2</sub>**, at 298, 303 and 310 K.
